# Supplementary material for: Reviewing progress in public involvement in NIHR research: developing and implementing a new vision for the future
Source: PubMed Central journal article supplement (PMC6067369; doi:10.1136/bmjopen-2017-017124), 2018-07-30
Supplement: bmjopen-2017-017124.draft_revisions.pdf [file bmjopen-2017-017124.draft_revisions.pdf]

# BMJ Open

BMJ Open is committed to open peer review. As part of this commitment we make the peer review history of every article we publish publicly available.

When an article is published we post the peer reviewers' comments and the authors' responses online. We also post the versions of the paper that were used during peer review. These are the versions that the peer review comments apply to.

The versions of the paper that follow are the versions that were submitted during the peer review process. They are not the versions of record or the final published versions. They should not be cited or distributed as the published version of this manuscript.

BMJ Open is an open access journal and the full, final, typeset and author-corrected version of record of the manuscript is available on our site with no access controls, subscription charges or pay-per-view fees (<http://bmjopen.bmj.com>).

If you have any questions on BMJ Open's open peer review process please email [info.bmjopen@bmj.com](mailto:info.bmjopen@bmj.com)

# BMJ Open

## Reviewing progress in public involvement in NIHR research: Developing and implementing a new vision for the future

|                               |                                                                                                                                                                                                                                                                                                                                                                                                                                                                                                                                                                                                                          |
|-------------------------------|--------------------------------------------------------------------------------------------------------------------------------------------------------------------------------------------------------------------------------------------------------------------------------------------------------------------------------------------------------------------------------------------------------------------------------------------------------------------------------------------------------------------------------------------------------------------------------------------------------------------------|
| Journal:                      | <i>BMJ Open</i>                                                                                                                                                                                                                                                                                                                                                                                                                                                                                                                                                                                                          |
| Manuscript ID                 | bmjopen-2017-017124                                                                                                                                                                                                                                                                                                                                                                                                                                                                                                                                                                                                      |
| Article Type:                 | Research                                                                                                                                                                                                                                                                                                                                                                                                                                                                                                                                                                                                                 |
| Date Submitted by the Author: | 30-May-2017                                                                                                                                                                                                                                                                                                                                                                                                                                                                                                                                                                                                              |
| Complete List of Authors:     | Staniszewska, Sophie; University of Warwick, Warwick Medical School<br>Denegri, Simon; NIHR, National Director for Public Participation and<br>Engagement in Research; INVOLVE,<br>Matthews, Rachel; National Institute of Health Research Collaboration for<br>Leadership in Applied Health Research and Care (NIHR CLAHRC) Northwest<br>London, UK/ Imperial College, UK, National Institute of Health Research<br>Collaboration for Leadership in Applied Health Research and Care (NIHR<br>CLAHRC) Northwest London, UK/ Imperial College, UK<br>Minogue, Virginia; NHS England , Commissioning Strategy Directorate |
| Keywords:                     | Patient and public involvement, Public engagement, Health policy <<br>HEALTH SERVICES ADMINISTRATION & MANAGEMENT                                                                                                                                                                                                                                                                                                                                                                                                                                                                                                        |
|                               |                                                                                                                                                                                                                                                                                                                                                                                                                                                                                                                                                                                                                          |

SCHOLARONE™  
Manuscripts

# Reviewing progress in public involvement in NIHR research: Developing and implementing a new vision for the future

Staniszewska S (1), Denegri S, (2) Matthews R, (3) Minogue V (4)

(On behalf of the Breaking Boundaries Review Panel)

Corresponding author: (1) Dr Sophie Staniszewska, RCN Research Institute, Warwick Medical School, Division of Health Sciences, University of Warwick, Coventry CV4 7AL. Tel: 024 7615 0622

[sophie.staniszewska@warwick.ac.uk](mailto:sophie.staniszewska@warwick.ac.uk)

**Funding statement:** This work was supported by National Institute for Health Research. SS is part-funded by CLAHRC WM.

(2) Simon Denegri, NIHR National Director for Patients and the Public in Research and Chair, INVOLVE, hosted by UCL School of Life and Medical Sciences

(3) Rachel Matthews, National Institute for Health Research (NIHR) Collaboration for Leadership and Applied Health Research and Care (CLAHRC) Northwest London

(4) Dr Virginia Minogue, NHS England, Leeds, UK

**Keywords:** Public involvement, engagement, research, policy, barriers, enablers

## Abstract

**Objectives:** To review the progress of public involvement (PPI) in NIHR (National Institute for Health Research) research, identify barriers and enablers, reflect on the influence of PPI on the wider health research system in the UK and internationally, and develop a vision for public involvement in research for 2025. The developing evidence base, growing institutional commitment and public involvement activity highlights its growth as a significant international social movement.

**Design:** The 'Breaking Boundaries Review' was commissioned by the Department of Health. An expert advisory panel was convened. Data sources included; an online survey, international evidence sessions, workshop events, open submission of documents and supporting materials and existing systematic reviews. Thematic analysis identified key themes. NVivo was used for data management. The themes informed the report's vision, mission and recommendations, published as 'Going the Extra Mile – Improving the health and the wealth of the nation through public involvement in research.' The Review is now being implemented across the NIHR.

**Results:** This paper reports the Review findings, the first of its type internationally. A range of barriers and enablers to progress were identified, including attitudes, resources, infrastructure, training and support, and leadership. The importance of evidence to underpin practice and continuous improvement emerged. Co-production was identified as a concept central to strengthening public involvement in the future. The Vision and Mission are supported by four suggested measures of success, reach, refinement, relevance and relationships.

**Conclusions:** The NIHR is the first funder of its size and importance globally to review its approach to public involvement. While significant progress has been made, there is a need to consolidate progress and accelerate the spread of effective practice, drawing on evidence. The outcomes of the Review are being implemented across the NIHR. The findings and recommendations have transferability for other organisations, countries, and individuals.

## Strengths

- The NIHR is the first funder of its size and importance globally to review its approach to public involvement.
- The breadth of the evidence collected including from patients, carers and the public, NIHR facilities and institutions, other funders and research organisations, and international initiatives.
- Evidence-based policy development that is now being implemented.

## Limitations

- Review primarily focused on research activities of the NIHR
- Further exploration required to assess equivalence of themes in international contexts.
- Evidence gathering and analysis was limited by available resources.

**Funding statement:** This work was supported by the National Institute for Health Research (NIHR). SS is part-funded by CLAHRC WM.

Word count: 6698 excluding tables, references and appendices.

## Background

### Introduction

Public involvement is becoming an increasingly important feature of health research, nationally and internationally. Public involvement – as defined by INVOLVE and adopted for the National Institute for Health Research (NIHR) Review in England is undertaken ‘with’ or ‘by’ patients or members of the public, rather than ‘to’, ‘about’ or ‘for’ them.<sup>1</sup> It can mean people becoming members of the research team, or part of reference groups, involved in key discussions and decisions, sharing their unique knowledge, expertise and perspective. For example, they may be involved in identifying key research questions, planning study designs, selecting appropriate outcome measures, collecting data, analysing and interpreting data, disseminating and implementing results.<sup>1</sup> This active involvement is different from people participating as passive subjects in clinical trials with little contribution to identifying its need, designing, conducting or interpreting the trial. It also differs from public engagement which creates a dialogue between researchers and the public to improve public awareness and understanding about research.<sup>2</sup> The intention of public involvement is to prioritise and create research that is relevant, acceptable and appropriate from the patient or public perspective.<sup>3-6</sup> It may be more likely to be implemented, creating greater impact on health and well-being, particularly if patients also have an active role in implementation.<sup>7</sup> It can also help avoid waste in research by ensuring it focuses on issues of importance and benefit for patients<sup>8</sup>, so maximising the potential for democratic accountability to the wider public, who fund a significant proportion of UK research.

Public involvement is growing as a movement in the UK, Canada, Australia, Europe and the US.<sup>15</sup> For instance, in the US, the Patient Centred Outcomes Research Institute (PCORI) encourages patients to submit research questions, provide input on funding applications, participate in events and become an ambassador, reflecting many aspects of NIHR activity.<sup>16</sup> The developing evidence base and growing institutional commitment to public involvement highlights its growth as an international social movement, gathering strength and creating significant changes in research is conducted. Public involvement is focusing on how individuals, communities and patient groups can co-

1  
2  
3 produce with researchers and health professionals, knowledge that will underpin their  
4 care and treatment. The potential benefits of public involvement in research and on  
5 researchers, patients and the wider community have been identified.<sup>4,5,6</sup> The beneficial  
6 impacts of public involvement on research, researchers, patient and communities  
7 include the: identification of patient-relevant topics; grounding of studies in the day-to-  
8 day reality of patient experience, enhancing the relevance and appropriateness of  
9 studies; identification of patient important outcome measures and; solving challenges in  
10 securing informed consent. For patients and the public benefits include: feeling listened  
11 to and empowered; increased confidence and self-worth and, enhanced skills for self-  
12 management.<sup>4,5,6</sup> Patients involved in research can also benefit in a number of ways  
13 which can improve their experience of care.<sup>10,11,12</sup> In summary, public involvement has  
14 been found to have a significant role to play in improving the effectiveness and  
15 efficiency of research<sup>13</sup> and community and patient empowerment are seen as critical  
16 elements in helping the NHS meet future challenges.<sup>14</sup>  
17  
18  
19  
20  
21  
22  
23  
24  
25  
26  
27

28 Nonetheless, in spite of the emerging evidence base for public involvement over the last  
29 twenty years, and a noticeable increase in the number of papers published more  
30 recently, challenges remain. These include the quality and utility of the evidence base  
31 for practice, including poor conceptualisation, varied definitions, limited capture or  
32 measurement of PPI impact and relatively few studies looking at later outcomes of PPI  
33 in research.<sup>4,5,6</sup> A significant difficulty is inconsistent reporting of PPI, with studies often  
34 providing partial reporting of their aims, methods and results of PPI in their studies,  
35 limiting our understanding of them.<sup>9</sup>  
36  
37  
38  
39  
40  
41  
42

### 43 **The UK context**

44  
45 In the UK, the NIHR pioneered a strong policy approach to public involvement including  
46 high level support from the Chief Medical Officer.<sup>17</sup> It also established an organisational  
47 infrastructure and system for its advancement, delivery and support and INVOLVE, the  
48 NIHR funded national advisory group for the promotion and advancement of public  
49 involvement. The resulting environment has enabled public involvement to flourish and  
50 become a strategic priority for NIHR. Professor Dame Sally Davies (Chief Medical  
51 Officer) said,  
52  
53  
54  
55  
56  
57  
58  
59  
60

1  
2  
3  
4 *“No matter how complicated the research, or how brilliant the researcher, patients and*  
5 *the public always offer unique, invaluable insights. Their advice when designing,*  
6 *implementing and evaluating research invariably makes studies more effective, more*  
7 *credible and often more cost effective.”<sup>18</sup>*  
8  
9  
10

## 11 **The need for the Review**

12  
13  
14 After 10 years of the NIHR promoting and advancing public involvement across its  
15 growing infrastructure and associated activities, there was a need to review progress  
16 within a UK and international context. The ‘Breaking Boundaries Review’ was  
17 announced by the Department of Health on March 31st 2014 and reported as ‘Going the  
18 Extra Mile’<sup>2</sup> a year later. It was the first such Review by the NIHR of its public  
19 involvement work and the first of its type internationally. It was designed as an open and  
20 collaborative exercise involving patients, the public, other funders and partners  
21 nationally and internationally.  
22  
23  
24  
25  
26  
27  
28  
29

## 30 **Aims:**

- 31 1. To review progress made in public involvement in research the UK.
- 32 2. To develop a vision for public involvement in research for 2025 vision and  
33 objectives for the NIHR’s leadership in public involvement.
- 34 3. To identify cultural and organisational development required to fulfil the vision of  
35 public involvement as an embedded component of health research in NIHR.  
36  
37  
38  
39  
40  
41

## 42 **Review panel**

43  
44 A Review Panel was established to shape the Review. Members’ expertise included  
45 research, policy, research management, and patient and public involvement. Three  
46 members were service users. A full list of members is provided in appendix 1.  
47  
48  
49  
50

## 51 **Ethical aspects**

52  
53 While formal ethical approval was not sought through an NHS ethics committee for this  
54 policy review, it was conducted according to Health Research Authority (HRA) principles  
55  
56  
57  
58



of good ethical conduct in research which were applied to relevant stages of the Review. Respondents were invited to read an information sheet about the Review before participating. All respondents were assured of anonymity and confidentiality, unless they gave explicit permission to be quoted. Any identifying information was removed from quotes used within the main report and publications. All submissions were stored on the NIHR CLAHRC Northwest London Imperial College computer system in password protected files.

### **Collection of evidence, experiences and perspectives**

The Panel carefully considered the type of evidence and information required to address the aims of the Review. It recognised the importance of peer-reviewed evidence as a context for the Review. Moreover the expert Panel also recognised the importance of developing a rigorous process of data collection and analysis, to contribute to high quality evidence-informed policy recommendations. However, it was also felt that a wider collection of evidence, experience and perspectives was necessary, in order to adequately address the Review questions and to meet the NIHR's public involvement values and principles. Five key approaches were selected to facilitate the breadth of evidence collection, nationally and internationally, summarised in table 1.

**Table 1. A summary of methods of data collection**

|                                                                                     |
|-------------------------------------------------------------------------------------|
| 1. Online questionnaire                                                             |
| 2. Audio and video evidence                                                         |
| 3. Document review                                                                  |
| 4. International, third sector and industry representatives evidence panel sessions |
| 5. Workshops, meetings, social media                                                |

#### **1. Online questionnaire**

1  
2  
3 A survey monkey online questionnaire was developed in collaboration with the Panel to  
4 minimise respondent burden and maximize response. Five key questions were posed to  
5 respondents. These were felt by the Panel to align with the aims of the Review and its  
6 key themes. The survey questions were also made available as a downloadable word  
7 document which could be completed electronically or by hand and posted. A purposive  
8 sampling strategy was used to identify a wide range of potential respondents, including  
9 individuals and organisations, with the intention of maximising variation in response.<sup>19</sup>  
10 Individuals and organisations targeted included patients and members of the public,  
11 researchers, clinicians, researchers, user-groups, patient organisations, charities and  
12 policy makers nationally and internationally. The initial email with the link to the on-line  
13 survey was sent to a range of individuals and organisations, who were asked to  
14 cascade it to others nationally and internationally. It was also available on the NIHR  
15 INVOLVE website. It was not possible to identify a final sample size because the email  
16 was cascaded through the public involvement community and within the NIHR.  
17  
18  
19  
20  
21  
22  
23  
24  
25  
26

## 28 **2. Audio and video evidence**

29  
30  
31 Potential respondents to the call for evidence were offered the opportunity to submit  
32 evidence in other formats including audio and video, although no respondents opted for  
33 this.  
34  
35

## 36 **3. Document review**

37  
38  
39 Key documents including papers from the NIHR INVOLVE bibliography such as key  
40 systematic reviews and grey literature were utilised to underpin the Review. No  
41 systematic review was undertaken due to limited resources. Instead Review Group  
42 members and respondents provided key papers, reviews and reports to provide  
43 appropriate background and ensure the underpinning evidence base was considered.  
44  
45  
46  
47  
48  
49

## 50 **4. International, third sector and industry evidence**

51  
52  
53 In addition to written submissions the Review panel requested input from international  
54 colleagues, the third sector and pharmaceutical industry. In total, three panels  
55  
56  
57  
58  
59  
60

1  
2  
3 convened, one panel focusing on international perspectives, one focusing on industry  
4 views and one focusing on third sector opinion. A set of questions were developed by  
5 the Review Panel to support discussion with invited experts which focused on the  
6 broader impact of NIHR's public involvement strategy, progress in different sectors,  
7 perspectives on how successful the NIHR had been, gaps in provision and areas where  
8 it had been less successful.  
9  
10  
11  
12

### 13 14 **5.Workshops, meetings, social media**

15  
16 Members of the Review Panel joined four workshops hosted by the research team  
17 undertaking a key NIHR PPI study called RAPPORT<sup>20</sup> in order to gather evidence.  
18 Meetings were held in London, Cambridge, Bristol and Newcastle. Social media was  
19 used to publicise the Review, generate debate and encourage submission. An  
20 additional workshop was conducted with representatives from medical charities hosted  
21 by Parkinson's UK in London. The discussions from workshops, meetings and social  
22 media provided a wider context for the Review and its final recommendations but they  
23 were not included as part of the NVivo analysis.  
24  
25  
26  
27  
28  
29  
30  
31

### 32 **Analysis**

33  
34  
35 Data submitted to the Review via the online survey, by email and post was managed  
36 using NVivo software for analysis. Thematic analysis was used to identify key themes  
37 emerging from the data.<sup>19</sup> Information provided through other methods was not included  
38 in this analysis, but rather provided wider context. A particular focus was on identifying  
39 common issues, and whether narrative patterns emerged across themes and whether  
40 any patterns related to the source of the evidence. Once a submission was received, it  
41 was logged and given a unique number and saved to the electronic password protected  
42 folder on the Imperial system. Initial thematic analysis was conducted by RM to identify  
43 recurrent or common themes. This included responses to the Review questions and the  
44 submission of any 'open' evidence. A formative summary was developed by RM of  
45 emerging themes, which included a high level summary in the context of the volume  
46 and sources of evidence. SS, VM and SD checked meaning and interpretation. The  
47 emerging themes were discussed with the Panel to check the interpretation of  
48  
49  
50  
51  
52  
53  
54  
55  
56  
57  
58  
59  
60

1  
2  
3 categories and themes. In order to further structure the analysis RM, SS and VM  
4 developed the emerging themes into a coding framework. The data was then analysed  
5 according to this framework. Development of themes continued until data saturation, the  
6 point at which no new major themes are evolving.<sup>19</sup> As the key themes were identified,  
7 SD, with RM, SS and VM identified broader conceptual themes which captured core  
8 components of the evidence submitted and provided the conceptual underpinning of the  
9 future vision and mission. Panel members also drew on the wider evidence which was  
10 documented from the discussion with the international, industry and third sector panels,  
11 the regional RAPPORT workshops and workshop with medical charities. Two meetings  
12 were held with the Review Panel to scrutinise all available evidence, review  
13 interpretations of data and prioritise the report themes.  
14  
15  
16  
17  
18  
19  
20  
21  
22  
23  
24

## 25 **Results**

26 82 responses were received from an individual, institutional, organizational or collective  
27 perspective with some submissions representing the combined views. These included  
28 submissions from different parts of the NIHR, medical research charities, universities,  
29 industry and third sector bodies. A total of 538 people responded to the online survey.  
30 Oral evidence sessions were held with colleagues from US, Denmark, Germany,  
31 Canada and Australia.  
32  
33  
34  
35  
36  
37  
38  
39  
40  
41  
42  
43  
44  
45  
46  
47  
48  
49  
50  
51  
52  
53  
54  
55  
56  
57  
58  
59  
60

**Table 2 – Respondent characteristics**

| <b>Respondent characteristic</b>                          | <b>Number</b> | <b>%</b> |
|-----------------------------------------------------------|---------------|----------|
| Public (service user/patient/consumer/carer)              | 174           | 40       |
| Researcher/academic                                       | 100           | 23       |
| Other research role (e.g. research manager, commissioner) | 39            | 9        |
| Voluntary sector                                          | 27            | 6        |
| User researcher                                           | 24            | 6        |
| Public involvement lead/specialist                        | 52            | 12       |
| Clinician/practitioner/service provider or manager        | 11            | 3        |
| Other                                                     | 6             | 1        |
| Total                                                     | 433           | 100      |
| Unknown                                                   | 105           | -        |

Key aspects of Review results are reported in this paper, focusing on positive impacts of PPI, barriers to PPI and then explore how PPI can be undertaken differently. Future delivery is considered and the resulting vision and mission are presented.

### **NIHR and INVOLVE as positive influences**

The evidence indicated that the NIHR's commitment to include the public in research activity has strengthened over the last ten years and that the presence and activities of INVOLVE has been important in achieving this. In addition, patients and carers reported a range of positive impacts including gaining insight into the research process and learning more about conditions and treatments. They also reported positive

relationships with researchers and welcomed the opportunity to gain new experiences, knowledge, skills and contacts. For example:

*'It has given me a platform to represent the views of carers and service users in the design and implementation of research. It has given me a role in life as a lifelong carer I have often felt apart from the world of work and have before my PPI work floated without a purpose.'* ID 156 Public

Researchers identified a range of positive impacts including changing their research focus to make it more relevant to patients, altering study designs to take account of experience and improved recruitment. Researchers reported feeling more purposeful and connected to the potential beneficiaries of research.

*'It has helped to keep my research close to the concerns of service users. Working with service user researchers in designing studies has been important in keeping the research questions and methodology focused on the concerns of those who will ultimately benefit.'* ID 332 Researcher/Academic

### **Relevance and usefulness of research with public involvement**

Respondents including those from third sector organizations reported that involvement could result in researchers being more likely to address issues of relevance to those with direct experience of a condition, treatment and care. Respondents also described aspects of personal transformation such as gaining new knowledge, changing attitudes and adopting different ways of doing things for example,

*'It has enabled increased recruitment through access to hard to reach and minority groups. It has ensured that public facing research materials are accessible and understandable for lay people - again, this increases recruitment. It has enabled evaluation of the experience of those participating in health research - and subsequent trial design has improved, again increasing recruitment. It has ensured where possible that research outcomes are disseminated in a timely and accessible way – resulting in a more informed patient population.'* ID 91 Public Involvement Lead/Specialist

### **Barriers to public involvement in research**

Respondents identified a range of ongoing barriers to public involvement including public awareness, attitudes, resources, infrastructure, recognition, reward and payment and resources and training.

## Public awareness

Although there was greater awareness of public involvement in research, it was felt that opportunities were not accessible to the wider population. Evidence submitted by those working in public health particularly emphasised the risk of reinforcing inequalities and missing opportunities to improve health in communities with the most to gain.

*"I think the whole 'public involvement' side of things is very good at the moment. However, the information (online) about it, such as the opportunities available and how to apply, could be simplified". ID 32 Public*

Many commented on the need for a high profile and well-crafted communication campaign to raise awareness of health research and demystify the activity in a way that the general population could engage with;

*'People need to know what is out there, how they can get involved and why it's happening. The acronyms, that then need to be spelt out and explained along with the many avenues an opportunity comes from, suddenly gets too difficult to decipher unless you're an academic or a clinician... ID 227 Other*

## Resources

Variability in the availability and allocation of resources to support involvement was a common theme. There was frustration that funding to support relationship building and partnership work ahead of preparing funding applications could be difficult to obtain, but was vital in providing an acceptable standard of good involvement practice in the early stages of research design.

## Infrastructure

As public involvement has grown across the NIHR, variation in the infrastructure to support activity has arisen. This raised questions about how infrastructure decisions are made, what evidence is available about effective models, and to what extent public involvement practice across the NIHR and the NHS can be aligned.

1  
2  
3 *'There is far too much duplication, working in silos and re-inventing the wheel. We need to free*  
4 *ourselves up to enable more time and resources for innovation and creativity. This needs to be*  
5 *joined up with academic and NHS public involvement strategies so that patients have one gateway*  
6 *into involvement opportunities and clear signposting from there'. ID 526 Public Involvement*  
7 *Lead/Specialist*  
8  
9

## 10 11 **Recognition, reward and payment**

12  
13 Another significant barrier was the issue of recognition, reward, reimbursement and  
14 payment. Despite the availability of guidance, local NHS and Higher Education  
15 Institutional policies and administrative practices could be problematical which could  
16 slow down prompt reimbursement and payment. Current austerity policies added to  
17 those challenges. There is a risk that those who get involved are those who can afford  
18 the time and money to do so, compounding issues of exclusion.  
19  
20  
21  
22  
23

24  
25 *'Established groups can provide a wide range of support (research design, pre-funding through to*  
26 *dissemination... However, finance for groups such as these is precarious and without sustained and*  
27 *adequate funding it is difficult for groups to continue to develop and expand their contribution*  
28 *despite the increased requirement for PPI if bids are to be successful. Core funding is needed to fund*  
29 *administrative support of the group as well as advertising, outreach work, mentorship and training of*  
30 *current and new members. ID 29e Researcher/Academic*  
31  
32  
33

## 34 **Training and support**

35  
36 Many respondents commented on the need for training and support for public  
37 involvement. There was broad agreement that a basic level of support should be  
38 available to anybody who becomes involved and a minimum skill level and knowledge  
39 about public involvement should be incorporated into researcher training. It was  
40 acknowledged there is still significant development needed to embed PPI into the  
41 research culture in terms of training.  
42  
43  
44  
45  
46  
47

48 *'Currently the training provided is basic, to explain what PPI is and help researchers plan*  
49 *how to proceed (I have taught on such workshops). ID 74 Researcher/Academic*  
50  
51

52 *'Training early career researchers in good involvement practice would help increase*  
53 *confidence and understanding of public involvement and reduce the likelihood of bad*  
54 *involvement experiences.. ID 19e Charity*  
55  
56  
57  
58  
59  
60



## Inconsistency in approach

Some respondents identified difficulties of translating evidence of effective PPI into practice and noted the evolution of ad hoc practice. Many individuals and teams work independently of each other even within the same organization, institution or region although there are areas where a more collaborative approach is emerging. For some there is a desire to introduce standards whilst for others a systematic but flexible approach which addresses key elements such as 'why', 'how' and 'who' would be more helpful.

*Making all involvement opportunities task specific, time-limited, with clear expectations and guidance on what people should expect from being involved and how their input will be qualified (e.g. two-feedback/appraisal process on how people are performing). Providing information on outcomes of previous, relevant research and examples of how PPI was crucial to the effectiveness of the research trial. 'ID 91 Public Involvement Lead/Specialist*

While frameworks for planning evaluations exist, the approach to evaluating PPI was varied and inconsistent.

*One would be at the start of a study, to plan ahead how to evaluate the impact of PPI on the research, and on the contributors (cf. the PiiAF – Public Involvement Impact Assessment Framework document). The second would be, with other researchers and PPI representatives acting as 'critical friends', to reflect on a study at the end and thus to work out what to do better next time. ID 74 Researcher/Academic*

Some respondents highlighted increasing pressure to demonstrate the impact of PPI and ensure it forms part of a University submission to the Research Excellence Framework, the Higher Education Funding Council evaluation of research quality in England and Wales.

## Leadership

A supportive, competent and influential leadership was perceived as critical to the successful delivery of involvement. Respondents commented on the value of experiential knowledge of public involvement in leaders. Conversely, perceived lack of first-hand experience of PPI and limited or absent empathy with patients were thought

1  
2  
3 to diminish the status of some research leaders. It was suggested that champions of  
4 involvement are required from outside established involvement teams to promote  
5 changes in organisational and institutional culture.  
6  
7

## 8 9 **Challenges**

10  
11 A number of respondents reported poor experiences with PPI including a general sense  
12 of frustration from engaging with research, understanding the NIHR and how it links to  
13 services. There was also confusion around how to access information and opportunities  
14 about becoming involved, suggesting a varied picture of personal practice,  
15 organisational commitment and institutional culture.  
16  
17  
18  
19

20  
21  
22 *'I wholeheartedly agree with the intentions and principles of PPI... Unfortunately, I think that*  
23 *lip service is given to PPI by some academics. There is a lack of transparency about how*  
24 *service users who are involved in research studies are selected, approached, recruited and*  
25 *what biases might be operating.'* ID 15 Researcher/Academic  
26

27  
28 *...Some organisations are in a frenzy of PPI because they know they have to do it not*  
29 *because they want to.* ID 260 Public  
30

## 31 **Scepticism, professionalisation and confusion**

32  
33 Respondents reported a range of challenges when they undertook public involvement,  
34 including scepticism about its value, uncertainty about its underpinning theoretical  
35 concepts and unclear practice standards. Challenges also included individuals feeling  
36 confusion, apprehension and anxiety about how to conduct involvement in a way that  
37 demonstrated a positive impact. Researchers were sometimes wary of using  
38 experienced advisers because they perceived that the very experience those individuals  
39 started from may evolve and be diluted over time. Others felt the development of such  
40 specialist expertise was important and had a beneficial impact.  
41  
42  
43  
44  
45  
46  
47  
48

49  
50 *'PPI architecture tends to call for a small number of individuals to make a massive*  
51 *commitment. This means it is hard to find people who can do it and those who do come*  
52 *forward are probably not representative of the wider population. We should try to design*  
53 *more distributed systems which are less clunky and more dynamic (more "Web 2.0").*  
54 *Instead of periodic half-day meetings, break things up into smaller modules/components*  
55 *that can be distributed among more people so it is less of a burden for each person. This*  
56  
57  
58  
59

1  
2  
3 *could allow more people to get involved and it would democratize PPI.’ ID 216 Public*  
4 *Involvement Lead/Specialist*  
5

6  
7 While a range of barriers were identified and challenges were identified, respondents  
8 recognised that progress in developing and embedding PPI across the NIHR had been  
9 made. This had raised the profile of public involvement, established aspects of good  
10 practice and made a difference for patients and their families by ensuring research was  
11 more meaningful and focused on improved outcomes.  
12  
13  
14

## 15 16 **Doing public involvement differently**

17  
18 Respondents identified new ways of approaching involvement, reflecting a broad range  
19 of experience now emerging across the NIHR. A number of key areas for future  
20 development emerged.  
21  
22  
23

### 24 **Practice standards**

25  
26  
27 There was a perceived need to consolidate and use the available evidence to identify  
28 gaps in knowledge. The use of continuous improvement was suggested as way to  
29 improve practice standards alongside peer review, performance management, self-  
30 regulation and independent regulation.  
31  
32  
33

### 34 **Promotion and outreach**

35  
36  
37 Some respondents expressed a desire to extend and deepen the wider involvement of  
38 the general population in health research.  
39  
40  
41

42 *‘The sense that getting involved in medical research is an aspect of being a good citizen. I*  
43 *think we should foster a sense that the public have a right to participate and, at a minimum*  
44 *level, perhaps even a duty...I think we should build a sense of reciprocity. The public help by*  
45 *volunteering for trials so what does the public get back? ...The public pays the going rate for*  
46 *the medicines via the tax system and the NHS. .... So I think the reciprocity should come in*  
47 *the form of a bigger say in the direction and shaping of research. ID 216 Public Involvement*  
48 *Specialist/Lead*  
49  
50  
51

### 52 **Diversity and inclusion**

53  
54  
55  
56  
57  
58  
59  
60

1  
2  
3 Current involvement practice was perceived by some as being exclusive and not always  
4 fully meeting the requirements and goals of equality legislation. Respondents suggested  
5 a range of improvements:  
6  
7

8  
9  
10 *'Shorter interactive and more accessible involvement so that everyone can join'. ID 525*  
11 *Young People Advisory Group Researcher Adviser*

12  
13  
14 *This is difficult for many organisations. Seeing role models like themselves - old/young, non-*  
15 *white, not wearing grey suits - all these would help. People from unrepresented areas may*  
16 *believe that it's not for the likes of them to get involved so showing people who are like*  
17 *them, getting on and making a difference, is likely to be helpful.' ID 29 Public*  
18

19  
20 Respondents also commented on the need for involvement to more closely reflect  
21 diversity in the population. It was felt that if leaders and role models were  
22 promoted and recruited from varied backgrounds, this would encourage more  
23 people to become involved.  
24  
25  
26

27  
28  
29 *'Be more aware of community centres, faith centres as sources of research participants.*  
30 *Acknowledge public health expertise in their local communities; community support officers*  
31 *etc. Get Healthwatch involved. Local radio stations (e.g. we have had health/health*  
32 *research message put over local Punjabi radio) Research in the evenings? Weekends?*  
33 *Think differently about when research is done and where it is done. Think who are we going*  
34 *to get participating at that time? The times are usually convenient for the researchers*  
35 *rather than the participants. Make it clear that research studies welcome those with*  
36 *access and mobility difficulties. ID 240 Other*  
37  
38  
39

## 40 **The future design and delivery of public involvement in NIHR**

### 41 **Coordinate and collaborate**

42  
43  
44 The NIHR was seen as a complex network of organisations that could benefit from a  
45 shared aim for PPI that underpins and informs the development of national policy  
46 supported by local practice. Some regions in England and Wales are already moving to  
47 a position where individuals from different organisations and programmes are joining to  
48 share knowledge and resources, to enhance their own practice.  
49  
50  
51  
52  
53  
54  
55  
56  
57  
58  
59

1  
2  
3 *'Real progress in PPI will not be achieved without an effective mechanism for coordinating*  
4 *PPI efforts across the now many NIHR bodies that have a role in developing, fostering, or*  
5 *implementing PPI. It is essential there is a central body that will coordinate these efforts and*  
6 *will be responsible for ensuring that gaps do not occur, nor needless duplication. ID 24e*  
7  
8 *Public*  
9

## 10 11 **Flexible evidence-based methods**

12  
13 Some respondents suggested that the methods of involvement should be evaluated for  
14 their effectiveness. For example, the common practice of inviting one or two patients to  
15 join committees was perceived by some to be of limited value and likely to become less  
16 attractive as an approach. Many respondents felt that knowledge of the 'ingredients' of  
17 effective involvement needed to be developed.  
18  
19  
20  
21  
22

23  
24 *'Involve in the design and delivery as wide a constituency as possible - those with*  
25 *'knowledge', 'experience' and 'expertise', but also those who may be able to assist by asking*  
26 *questions, because they have different backgrounds.'* ID 23e Researcher/Academic  
27  
28  
29

30  
31 Better identification of the key points where involvement makes an impact was also  
32 regarded as important, particularly in relation to deciding research priorities, funding  
33 decisions, and translating findings into real benefits for patients. The need for greater  
34 openness and transparency in facilitating conversations with the public was also  
35 considered important. This would enable patients or members of the public to identify  
36 more collaborative or user-led approaches.  
37  
38  
39  
40

41  
42 *'One of the most widely mentioned 'metrics' of improved Public Involvement (PI) would be a*  
43 *growth in collaborative or user-led research. Suggestions for other specific indicators*  
44 *included: routine PI sections in annual reports and evaluation of PI in NIHR funded research*  
45 *project reports; increased representation of people from minority groups; and better*  
46 *recruitment to trials (the latter two suggestions being offered by public contributors). ID 15e*  
47 *RDS collective*  
48  
49  
50

51  
52 Third sector representatives and community voluntary organisations were identified as  
53 potential partners who could more effectively engage with people locally and nationally;  
54  
55  
56  
57  
58  
59  
60

1  
2  
3  
4  
5  
6  
7  
8  
9  
10  
11  
12  
13  
14  
15  
16  
17  
18  
19  
20  
21  
22  
23  
24  
25  
26  
27  
28  
29  
30  
31  
32  
33  
34  
35  
36  
37  
38  
39  
40  
41  
42  
43  
44  
45  
46  
47  
48  
49  
50  
51  
52  
53  
54  
55  
56  
57  
58  
59  
60

*'The voluntary sector could play a key role in both the design and delivery of NIHR funded research. NIHR could establish much stronger links between research charities (such as the Wellcome Trust, Cancer Research UK, the McPin Foundation) and NIHR funded bodies in order to jointly commission and fund research.'* ID 35e Voluntary Sector.'

## Continuous improvement

Respondents felt there was a need to collect data to enable continuous improvement and not just performance management.

*'What is required now is a national framework which sets minimum standards for PPI quality, against which funding and ethical approval decision making can be made. There should also be a move towards making incorporation of quality PPI work into funding application bids standard for all reviewing bodies (as done by NIHR). ID 51e Other*

## Developing a future vision

Many respondents, while recognizing progress made so far, expressed the desire to be ambitious for the future. For some this meant refining practice. For others it was much more about reframing the purpose of involvement entirely, working differently, and recognizing the positive connections between engagement, involvement and participation.

## Valued practice

Respondents felt that the debates about the need for public involvement should mature into discussions about what forms of involvement work in particular contexts. Individuals wanted to place their focus on improving the quality of their PPI in creating relevant research.

*'PPI should be routine – how things are done, not an optional extra. This should be embedded throughout the NHS so that all users of NHS services can expect that research evidence (is) supported by robust PPI. PPI isn't simply an issue for research but for patient care, too'. ID 15e RDS collective*

*'By ten years, public involvement should have a much greater profile than what it has now. Members of the public and patients should know that we actively do research in an array of*

1  
2  
3 *disease areas or conditions and that there are many opportunities for them to take part in*  
4 *this.'* ID 20e Public Involvement Lead/Specialist  
5  
6  
7  
8  
9  
10

## 11 **Better evaluation and evidence**

12  
13  
14  
15 The importance of evidence was a key theme, particularly in relation to how to best  
16 evaluate public involvement and embedding it into research thinking and practice:  
17

18  
19 *The evidence base would be substantially enhanced so that there was a consensus between NIHR, senior*  
20 *researchers, the public and other stakeholders on the value of public involvement and the key factors necessary to*  
21 *ensure effective involvement. We will have an agreed set of methods and indicators for assessing the impact of*  
22 *public involvement that will have contributed to building a convincing evidence base. Public involvement would be*  
23 *so embedded in the culture of NIHR that new staff or new researchers coming into the field would naturally take on*  
24 *the values and practices of effective public involvement.* ID 40e Researcher/Academic  
25  
26  
27  
28  
29  
30

## 31 **Key concepts**

32  
33  
34 Analysis of the themes emerging from the evidence submissions and synthesis of the  
35 data and discussion with the Review led to the development of a mission and vision as  
36 presented in appendix 1. Three concepts for measuring success were suggested:  
37  
38

- 39  
40 • Reach: the extent to which people and communities are engaged, participating  
41 and involved in NIHR research including the diversity of this population
- 42  
43 • Refinement and improvement: how public involvement is adding value to  
44 research excellence as funded by the NIHR.
- 45  
46 • Relevance: the extent to which public priorities for research are reflected in NIHR  
47 funding and activities
- 48  
49 • In addition to these three concepts, as the implementation of the  
50 recommendations has progressed, a fourth theme has emerged, relationships.  
51 This has been recognised as a significant determinant of success in  
52 strengthening public involvement.<sup>20</sup>  
53  
54  
55  
56  
57  
58  
59  
60



1  
2  
3  
4  
5 Underpinning these concepts is support for the principles of co-production as the basis  
6 of the NIHR's approach in the future. These draw on the Boyle<sup>30</sup> definition which  
7 emphasizes the importance of developing close collaborations based on valuing people  
8 as assets with knowledge; recognizing the expertise and perspective people bring to  
9 involvement; promoting good relationships and networks; a perception that all people  
10 involved can benefit from public involvement; recognizing that involvement often  
11 involves an exchange of some type; the process of involvement is important and  
12 requires facilitation; that there is a need to change some of the professional boundaries  
13 that may inhibit more collaborative forms of work.  
14  
15  
16  
17  
18  
19  
20  
21

## 22 **Implementing the Review**

23 In addition to the vision and mission, the Review led to a range of recommendations  
24 presented in appendix 2, designed to strengthen co-production and collaboration at the  
25 heart of research.  
26  
27  
28  
29  
30

31 These recommendations are now being actively taken forward across the NIHR. 'Going  
32 the Extra Mile' was signed off by the Chief Medical Officer, Professor Dame Sally  
33 Davies, in September 2015 with an instruction to NIHR leaders, organisations and staff  
34 to support its implementation.<sup>17</sup> This position has been supported with the decision by  
35 the Department of Health to regularly audit the NIHR's progress in public involvement  
36 using the report recommendations as its starting point. Lines of responsibility and  
37 accountability for public involvement have been strengthened accordingly.  
38  
39  
40  
41  
42  
43  
44

45 The INVOLVE Co-ordinating Centre's future work programme reflects the priorities  
46 highlighted in the report and is the NIHR's national lead of diversity and inclusion,  
47 learning and development, and community (incorporating co-production). A national  
48 champion for diversity and inclusion has been appointed. The UK continues to be the  
49 only country where national government funds and supports an organisation focused on  
50 public involvement in research.  
51  
52  
53  
54  
55  
56  
57  
58  
59  
60



1  
2  
3 INVOLVE, in partnership with the NIHR's Research Design Services (RDS)  
4 organisation, is in the process of supporting and developing regional networks to  
5 facilitate collaborative working at local and regional level. These will connect with  
6 existing fora and partnerships and will reach across traditional research, services  
7 boundaries. Work is ongoing to refresh the way in which the NIHR presents its public  
8 involvement work beginning with the new corporate website launched at the end of  
9 2016.  
10  
11  
12  
13  
14  
15

16  
17 Work is now well-advanced on developing self-assessment criteria in public involvement  
18 for NIHR organisations. These will be based on a set of values and principles for public  
19 involvement published by INVOLVE in 2015 and a series of workshops to discuss how  
20 best to evolve standards that organisations can operationalise and against which  
21 progress can be assessed. It is hoped that a number of NIHR organisations will pilot  
22 these standards in the near future. This work will feed into emerging thinking about  
23 current reporting requirements on initiatives and how these can be improved in ways  
24 which will best promote continuous improvement. The Review Panel considered and  
25 rejected the notion of a formal regulatory regime for public involvement in favour of an  
26 approach which supported and encouraged organisations and their staff.  
27  
28  
29  
30  
31  
32  
33  
34  
35

36 The programme of reform that is now underway is on top of ongoing innovation in public  
37 involvement activity generally. The expansion of the Patient Research Ambassadors  
38 Initiative (PRAI) across the NHS, the involvement of young people in research,  
39 promotion of public contribution to research through its 'OK to Ask' campaign, and  
40 growth of the James Lind Alliance Priority Setting Partnerships programme are all  
41 flagship initiatives which continue to receive support from the NIHR within the new  
42 strategic framework and approach.  
43  
44  
45  
46  
47  
48  
49

## 50 **Discussion and conclusions**

51  
52 Arguably the NIHR is the leading public research funder globally when it comes to the  
53 steps it has taken to make public involvement a core principle for how it funds and  
54  
55  
56  
57  
58  
59  
60

1  
2  
3 supports research excellence. It is perhaps inevitable that it should therefore be the first  
4 to attempt a review of the size and scale of 'Going the Extra Mile.'

5  
6  
7 While the main focus was England, its messages have potential relevance for other  
8 countries developing their public involvement, reflecting wider societal changes towards  
9 a democratisation of research that enhances the quality of research. Public involvement  
10 in the NIHR has made significant progress in the last decade, enabled by a strong  
11 policy and infrastructure, and implemented by a community of practitioners who  
12 recognise the value of actively involving patients and the public in research.  
13  
14  
15  
16  
17

18 The Review also identified a range of barriers including limited awareness of  
19 opportunities, lack of diversity, resistant attitudes to involvement, inconsistent levels of  
20 resources, systems that work in different ways, patchy training and support, and  
21 variable organisational implementation. A key finding from the Review is the need for a  
22 step change, increasing the rate of change and with a greater focus on embedding  
23 public involvement in research culture, so that it becomes 'business as usual'. The  
24 NIHR implementation plan is now starting to address this need but its ambition needs to  
25 be recognised as the rule and norms of research need to change for involvement to  
26 properly flourish.  
27  
28  
29  
30  
31  
32  
33  
34

35 While the focus was national, there are important international implications from the  
36 Review. Co-ordination and collaboration across organisations, funders and systems  
37 nationally and internationally to deliver high quality public involvement is vital. Public  
38 involvement needs to be underpinned by a strong evidence base which enables the  
39 development of effective practice that is continuously improved and creates a positive  
40 impact. The promotion of opportunities alongside the creation of greater diversity of  
41 individuals involved will help ensure a wide range of voices are heard.  
42  
43  
44  
45  
46  
47

48 In analysing the evidence gathered for the Review, four key concepts emerged; reach,  
49 refinement and improvement, relevance, and relationships. Relationships was added, in  
50 the implementation phase, as an additional key concept, vital to the delivery of the  
51 future vision. Reach refers to the extent of involvement, engagement and participation,  
52 ensuring diversity among members of the public who become involved. To achieve  
53  
54  
55  
56  
57  
58  
59  
60

1  
2  
3 'reach' researchers and research may need to work closely with the public to develop  
4 new ways of working to ensure diversity and inclusion are embedded within  
5 involvement. Relevance is focused on the extent to which public priorities for research  
6 are reflected in funding and activities. In an era of limited public funding, there is an  
7 ethical imperative to ensure public monies are spent on research that patients feel has  
8 most relevance to their lives and the beneficial impact it may create. Relevance also  
9 refers to ensuring the research questions in a study are focused on what is acceptable  
10 and appropriate from the patient perspective. Drawing on evidence to refine practice  
11 through continuous improvement underpins attempts to develop relevance.  
12  
13  
14  
15  
16  
17  
18

19 The thematic analysis underpinned the development of the vision of '*Going the Extra*  
20 *Mile*,' of a population actively involved in research to improve health and wellbeing for  
21 themselves, their family and their communities. The mission of '*Going the Extra Mile*' is  
22 of the public as partners in everything we do to deliver high quality research that  
23 improves the health, wellbeing and wealth of the nation. Underpinning this future  
24 mission is the principles of co-production, which emerged as an important way of  
25 understanding the step change required in public involvement. At its heart is the co-  
26 production of knowledge and evidence through the creation of ways of working, cultures  
27 and systems that support this. From a research perspective, co-production offers a way  
28 of constructing 'complete' knowledge that includes all relevant aspects of a concept.  
29  
30  
31  
32  
33  
34  
35  
36

37 *"In recent years an approach to research that embeds active participation by those with experience of the focus of*  
38 *that research has been championed both from the human rights perspective, that people should not be excluded*  
39 *from research that describes and affects their lives, and from a methodological perspective in terms of rigorous*  
40 *research: "... knowledge constructed without the active participation of practitioners can only be partial*  
41 *knowledge" (33)*  
42  
43  
44

45 In conclusion, '*Going the Extra Mile*' challenges researchers, research and the  
46 organisations and institutions that fund and promote it to go further in working alongside  
47 citizens. The Rome Declaration on Responsible Research and Innovation in Europe in  
48 November 2014 emphasizes the need to evolve a more inclusive approach to research.  
49  
50  
51  
52

53 *"Hence, excellence today is about more than ground-breaking discoveries – it includes openness,*  
54 *responsibility and the co-production of knowledge."* p.1  
55  
56  
57  
58  
59  
60

1  
2  
3 Our vision for the future is ambitious and may take many years to achieve. At its heart  
4 there is a fundamental re-orientation of research, its focus, how it is undertaken and  
5 how knowledge is created. As others have said, “if PPI were a drug, it would be  
6 malpractice not to prescribe it.” The benefits of co-production could lead us to a new era  
7 in research, one that is focused on the co-production of knowledge that benefits  
8 humanity in a new and fundamental way. Our ambition is that the ‘Going the Extra Mile’  
9 Review escalates such paradigm shift and contributes to changing the nature and role  
10 of research, for the benefit of patients, public and wider society.  
11  
12  
13  
14  
15  
16  
17  
18  
19  
20  
21  
22  
23  
24  
25  
26  
27  
28  
29  
30  
31  
32  
33  
34  
35  
36  
37  
38  
39  
40  
41  
42  
43  
44  
45  
46  
47  
48  
49  
50  
51  
52  
53  
54  
55  
56  
57  
58  
59  
60

### Contribution

SS, SD, RM and VM were all members of the Review Panel. They all made substantial contributions to the conception and design of the work; to the acquisition, analysis, or interpretation of data for the work; and the drafting the paper, revising it critically for important intellectual content and approving the final version to be published. All authors agreed to be accountable for all aspects of the work in ensuring that questions related to the accuracy or integrity of any part of the work are appropriately investigated and resolved.

### Conflict of interest

SS is Co-Editor in Chief of Research Involvement and Engagement. SS is based at the RCN RI at Warwick Medical School and is part funded by CLAHRC WM. SD is a member of the BMJ Editorial Board. RM and VM declare no conflict of interest. This article presents independent research commissioned by the National Institute for Health Research (NIHR) under the Collaborations for Leadership in Applied Health Research and Care (CLAHRC) programme for North West London. The views expressed in this publication are those of the author(s) and not necessarily those of the NHS, the NIHR or the Department of Health.

### Copyright

The Corresponding Author grants on behalf of all authors an exclusive licence (or non exclusive for government employees) on a worldwide basis to the BMJ Publishing Group Ltd to permit this article (if accepted) to be published in BMJ editions and any other BMJ PGL products and sublicences such use and exploit all subsidiary rights, as set out in our licence."

**Transparency declaration:** The lead author affirms that the manuscript is an honest, accurate, and transparent account of the study being reported; that no important aspects of the study have been omitted; and that any discrepancies from the study as planned (and, if relevant, registered) have been explained.

## Funding

The 'Going the Extra Mile' policy review was funded by the National Institute for Health Research.

## Data sharing statement

Data sharing: no additional data available.

For peer review only

1  
2  
3  
4  
5  
6  
7  
8  
9  
10  
11  
12  
13  
14  
15  
16  
17  
18  
19  
20  
21  
22  
23  
24  
25  
26  
27  
28  
29  
30  
31  
32  
33  
34  
35  
36  
37  
38  
39  
40  
41  
42  
43  
44  
45  
46  
47  
48  
49  
50  
51  
52  
53  
54  
55  
56  
57  
58  
59  
60

For peer review only

## References

1. INVOLVE. Briefing notes for researchers: Public involvement in NHS, public health and social care. Eastleigh: INVOLVE, 2012.
2. National Institute for Health Research. Going the Extra Mile: Improving the nation's health and wellbeing through public involvement in research. The final report and recommendations to the Director General Research and Development/Chief Medical Officer Department of Health of the 'Breaking Boundaries' strategic review of public involvement in the National Institute for Health Research, 2015.
3. Oliver S, Rees R, Clarke-Jones L, Milne R, Oakley A, Gabbay J et al. A multidimensional conceptual framework for analysing public involvement in health services research. *Health Expectations*. 2008 Mar; 11(1):72-84. Available from: 10.1111/j.1369-7625.2007.00476.x
4. Brett J, Staniszewska S, Mockford C et al. A systematic review of the impact of patient and public involvement on service users, researchers and communities. *The Patient* 2014; DOI 10.1007/s40271-014-0065-0
5. Brett J, Staniszewska S et al. Mapping the impact of patient and public involvement on health and social care research: a systematic review. *Health Expectations* 2012. DOI: 10.1111/j.1369-7625.2012.00795.x
6. Mockford C, Staniszewska S et al (2012). A systematic review of the impact of patient and public involvement on health and social services. *International Journal of Quality in Health Care*. doi: 10.1093/intqhc/mzr066.
7. Staniszewska S, Thomas V, Seers K (2013). Patient and public involvement in the implementation of evidence into practice. *Evidence Based Nursing*, 10.1136/eb-2013-101510.
8. Chalmers I, Glasziou P. Avoidable waste in the production and reporting of research evidence. *Lancet*. 2009 Jul 4; 374(9683):86-9. doi: 10.1016/S0140-6736(09)60329-9. Epub 2009 Jun 12.
9. Staniszewska S, Brett J, Mockford C et al. The GRIPP checklist: Strengthening the quality and transparency of reporting for patient and public involvement in research. *International Journal of Technology Assessment for Health Care* 2011; 27 (4):391-399.
10. Coulter A, Collins A. Making Shared Decision-Making a reality. No decision about me, without me. The Kings Fund, 2011
11. Robert, G. (2013) Participatory action research: using experience-based co-design to improve the quality of healthcare services. Chapter 14 in *Understanding and Using Health Experiences*. Ziebland, S. Coulter, A. Calabrese, J. Locock, L. (eds) Oxford , Oxford University Press



- 1  
2  
3  
4 12. Foot, C. Gilburt, H. Dunn, P. et al (2014) *People in control of their own health. The*  
5 *state of Involvement*. London, The King's Fund  
6  
7  
8 13. Ennis, L. Wykes, T. (2013) Impact of patient involvement in mental health research:  
9 longitudinal study. *The British Journal of Psychiatry* 203: pp 381-6  
10  
11 14. NHS England (2014) Five Year Forward View. London: Department of Health.  
12  
13 15. Patient Centred Outcomes Research Institute (PCORI) Website  
14 <http://www.pcori.org/get-involved> Accessed 9 January 2017  
15  
16  
17 16. National Institute for Health Research (NIHR) Website.  
18 <http://www.nihr.ac.uk/patients-and-public/> Accessed 9 January 2017  
19  
20  
21 17. Chief Medical Officer response to NIHR Going the Extra Mile Policy Review.  
22 [http://www.nihr.ac.uk/newsroom/response-to-going-the-extra-mile-from-professor-dame-](http://www.nihr.ac.uk/newsroom/response-to-going-the-extra-mile-from-professor-dame-sally-c-davies-the-governments-chief-medical-officer/3056?diaryentryid=10192)  
23 [sally-c-davies-the-governments-chief-medical-officer/3056?diaryentryid=10192](http://www.nihr.ac.uk/newsroom/response-to-going-the-extra-mile-from-professor-dame-sally-c-davies-the-governments-chief-medical-officer/3056?diaryentryid=10192)  
24 (Accessed 7 March 2016)  
25  
26 18. Staley K (2009).Exploring impact: public involvement in NHS, public health and  
27 social care research. Eastleigh:INVOLVE.  
28  
29  
30 19. Creswell, J. Qualitative Inquiry & Research Design: Choosing Among Five  
31 Approaches. Thousand Oaks. CA: Sage Publications, 2007.  
32  
33 20. Wilson P, Mathie E, Keenan J, McNeilly E, Goodman C, Howe A, Poland F,  
34 Staniszewska S, Kendall S, Munday D, Cowe M, Peckham S ReseArch with Patient and  
35 Public invOLvement: a RealisT evaluation - the RAPPORT study. Journal: Health  
36 Services and Delivery Research Volume: 3 Issue: 38 Publication date: September 2015.  
37 DOI: <http://dx.doi.org/10.3310/hsdr03380>  
38  
39  
40 30. Boyle D, Slay J, Stephens L. Public Services Inside Out. Putting co-production into  
41 practice. London: NESTA, 2010.  
42  
43  
44 31. Boyle, D. Harris, M (2009) *The challenge of co-production. How equal partnerships*  
45 *between professionals and the public are crucial to improving public services*. NESTA,  
46 London  
47  
48 32. Boyle, D. Slay, J. Stephens, L. (2010) *Public Services Inside Out. Putting co-*  
49 *production into practice*. NESTA, London.  
50  
51  
52 33. Somekh, B. (2002). Inhabiting each other's castles: Towards knowledge and mutual  
53 growth through collaboration. In Christopher Day, John Elliott, Bridget Somekh &  
54 Richard Winter (Eds.), *Theory and practice in action research: Some international*  
55 *perspectives* (pp.79-104). Oxford:Symposium Books  
56  
57  
58  
59  
60

## Appendix 1 Vision, mission, strategic goals and principles for 2025

### Vision

A population actively involved in research to improve health and wellbeing for themselves, their family and their communities.

### Mission

The public as partners in everything we do to deliver high quality research that improves the health, wellbeing and wealth of the nation.

### Strategic goals

1. Opportunities to engage and become involved in research are visible and seized by the public.
2. The experience of patients, service users and carers is a fundamental and valued source of knowledge.
3. Public involvement is a required part of high quality research conducted by researchers and their institutions.
4. Public involvement is locally driven and relevant whilst strategically consistent with the NIHR's goals
5. Evidence of what works is accessible so that others can put it into practice
6. The NIHR has maintained its global presence and influence for working in partnership with the public.

### Principles

1. Building on people's existing capabilities
2. Promoting mutuality and reciprocity
3. Developing peer support networks
4. Breaking down boundaries
5. Facilitating as well as delivering
6. Recognising people and their experiences as assets

Adapted from Boyle, D, Slay , J and Stephens L. (2010) *Public Services Inside Out. Putting Co-production into Practice*. NESTA, London

## Appendix 2 Going the Extra Mile Recommendations

|                                             |                                                                                                                                                                                                                                                                                                                                                                                                                                                                                                                                                                                                                                                                                                                                                                                                                                                                                                                                                                                                                                                                                                                                                                                                                                                                                                                                  |
|---------------------------------------------|----------------------------------------------------------------------------------------------------------------------------------------------------------------------------------------------------------------------------------------------------------------------------------------------------------------------------------------------------------------------------------------------------------------------------------------------------------------------------------------------------------------------------------------------------------------------------------------------------------------------------------------------------------------------------------------------------------------------------------------------------------------------------------------------------------------------------------------------------------------------------------------------------------------------------------------------------------------------------------------------------------------------------------------------------------------------------------------------------------------------------------------------------------------------------------------------------------------------------------------------------------------------------------------------------------------------------------|
| <p><b>Communication and Information</b></p> | <ul style="list-style-type: none"> <li>■ A consortium including the NIHR, NHS England, Public Health England and public representation should be established on a time-limited basis to consider the needs of patients and the public for information about research. It should have the ability to develop and test different approaches to providing people with information as part of the care pathway and in different service contexts.</li> <li>■ A single access point or ‘portal’ for enabling patients and the public to access information simply and easily about research how they contribute locally and nationally should be co-produced by the NIHR, NHS England, patients and the public and third sector organisations. NHS badging and placement will be an important to public trust.</li> <li>■ The NIHR should run an annual competition to identify best practice and new ideas in using social media and new technology in public involvement, engagement and participation.</li> </ul>                                                                                                                                                                                                                                                                                                                  |
| <p><b>Culture</b></p>                       | <ul style="list-style-type: none"> <li>■ The NIHR should commission the development of a set of values, principles and standards for public involvement. These must be co-produced with the public and other partners. They should be framed in such a way, and with a clear set of self-assessment criteria, so that organisations across the NIHR see their adoption as integral to their continuous improvement in public involvement. The achievements of the public, staff and researchers in promoting and advancing public involvement should be celebrated and acknowledged by the NIHR.</li> <li>■ The strategic goals identified in this report should be included in the NIHR overall strategic plan – otherwise known as Vision, Strategy, Actions, Measures (VSAM). These should be the objectives against which public involvement, engagement and participation are planned and reported across the NIHR health research system.</li> </ul>                                                                                                                                                                                                                                                                                                                                                                       |
| <p><b>Continuous improvement</b></p>        | <ul style="list-style-type: none"> <li>■ We recommend that INVOLVE builds on its forthcoming report on organisational approaches to learning and development by providing leadership and co-ordination including working with workforce development initiatives across the NIHR. It is clear from our inquiry that the public and researchers need to be better supported to do public involvement. All NIHR leaders, funded researchers and staff should receive an induction in public involvement as part of the overall change programme set out in this document. Public involvement leads across the NIHR should also have their own leadership and development programme and opportunities to network and share good practice.</li> <li>■ We recommend that the NIHR measures success along three indices for the foreseeable future:             <ul style="list-style-type: none"> <li>• Reach: the extent to which people and communities are engaged, participating and involved in NIHR research including the diversity of this population</li> <li>• Relevance: the extent to which public priorities for research are reflected in NIHR funding and activities</li> <li>• Refinement and improvement: how public involvement is adding value to research excellence as funded by the NIHR.</li> </ul> </li> </ul> |

|                      |                                                                                                                                                                                                                                                                                                                                                                                                                                                                                                                                                                                                                                                                                                                                                                                                                                                                                                                                                                                                                                                                                                                                                                                                                                                                                                                                                                                                                                                                                                                                                                                                                                                                                                                                                                |
|----------------------|----------------------------------------------------------------------------------------------------------------------------------------------------------------------------------------------------------------------------------------------------------------------------------------------------------------------------------------------------------------------------------------------------------------------------------------------------------------------------------------------------------------------------------------------------------------------------------------------------------------------------------------------------------------------------------------------------------------------------------------------------------------------------------------------------------------------------------------------------------------------------------------------------------------------------------------------------------------------------------------------------------------------------------------------------------------------------------------------------------------------------------------------------------------------------------------------------------------------------------------------------------------------------------------------------------------------------------------------------------------------------------------------------------------------------------------------------------------------------------------------------------------------------------------------------------------------------------------------------------------------------------------------------------------------------------------------------------------------------------------------------------------|
|                      | <ul style="list-style-type: none"> <li>■ The results of the 2014 Research Excellence Framework (REF) should be analysed by INVOLVE for key learnings and ways to develop this evidence base for REF2020. Above all, public involvement, particularly in relation to the gaining of knowledge, should have an equal importance to wider forms of engagement and science communication, within the REF 2020 definition of societal benefit for panels that have a service remit.</li> <li>■ An independent review should be commissioned by the NIHR in three years' time to assess the progress made in taking forward the recommendations in this report.</li> </ul>                                                                                                                                                                                                                                                                                                                                                                                                                                                                                                                                                                                                                                                                                                                                                                                                                                                                                                                                                                                                                                                                                           |
| <b>Co-production</b> | <p>The public, researchers and health professionals should be empowered and supported better to work together in the future. In respect of the co-production principles that we have been minded to embrace we recommend that the NIHR consider establishing a co-production taskforce to examine how these can be applied in practice. The taskforce should have the ability to undertake rapid-testing of these to establish their importance in delivering research excellence.</p>                                                                                                                                                                                                                                                                                                                                                                                                                                                                                                                                                                                                                                                                                                                                                                                                                                                                                                                                                                                                                                                                                                                                                                                                                                                                         |
| <b>Connectivity</b>  | <p>What's happening at grassroots level must continue to be the driving force in public involvement. Here we wish to see further support given to work that is <b>locally inspired and driven whilst strategically consistent</b> with the NIHR overall goals:</p> <ul style="list-style-type: none"> <li>■ Regional public involvement, engagement and participation 'citizen' forums and strategies should be developed in each of the Academic Health Science Networks (AHSN) geographies. We would expect the NIHR's Collaborations for Leadership in Applied Health Research and Care (CLAHRCs), Research Design Services (RDSs), Local Clinical Research Networks (LCRNs), Biomedical Research Centres and Units (BRC/Us) to play a key leadership role in the development of these.</li> <li>■ Regionally, locally and institutionally, NIHR infrastructure (CLAHRCs, BRU/, BRCs, LCRNs etc.) Directors and Boards should support and encourage public involvement leads to identify cross-cutting activity in public involvement and develop joint plans and stable resourcing where relevant.</li> <li>■ Regional and local partnerships should be identified by the National Director for Patients and the Public in Research to lead on tackling key challenges in the development of public involvement, beginning with diversity and inclusion.</li> <li>■ Building partnerships beyond NIHR boundaries – with servicepartners, third sector and civic organisations - should be seen as a marker of success in this area and measured appropriately.</li> <li>■ Strengthening and improving the support available to researchers locally and regionally through current delivery mechanisms such as the NIHR Research Design Service.</li> </ul> |

| <b>Appendix 2 - continued<br/>Recommendations</b> |                                                                                                                                                                                                                                                                                                                                                                                                                                                                                                                                                                                                                                                                                                                                                                                                                                                                                                                                                                                                                                                                                                                                                                                                          |
|---------------------------------------------------|----------------------------------------------------------------------------------------------------------------------------------------------------------------------------------------------------------------------------------------------------------------------------------------------------------------------------------------------------------------------------------------------------------------------------------------------------------------------------------------------------------------------------------------------------------------------------------------------------------------------------------------------------------------------------------------------------------------------------------------------------------------------------------------------------------------------------------------------------------------------------------------------------------------------------------------------------------------------------------------------------------------------------------------------------------------------------------------------------------------------------------------------------------------------------------------------------------|
| <b>Coordination</b>                               | <ul style="list-style-type: none"> <li>■ Leadership and appropriate governance structures will be vital to ensuring that the future development of public involvement in the NIHR has a clear sense of direction and is accountable. The NIHR National Director for Patients and the Public in Research should establish a leadership group consisting of public contributors, senior researchers, public involvement and engagement leads, and a supporting NIHR-wide public involvement forum of public involvement and engagement leads, to provide consistent and coordinated strategic leadership for public involvement, engagement and participation activities across NIHR and identify clear priorities for resourcing.</li> <li>■ All NIHR Coordinating Centres and infrastructure organisations should have a strategy, framework or plan that covers the promotion and advancement of public involvement, participation and engagement in research. Leadership, accountability and funding for this agenda within organisations must be clear and transparent. Progress should be reported annually, made publicly available and an overview included in the NIHRs annual report.</li> </ul> |
| <b>Community</b>                                  | <p>A diverse and inclusive public involvement community is essential if research is relevant to population needs and provides better health outcomes for all. We have been struck by the degree to which researchers and public contributors have encountered barriers when trying to work with different communities and populations. This suggests a system-wide issue that needs considered and careful attention. We would recommend that a specific NIHR workstream be developed in this area in the same way that it has developed other work programmes such as 'Adding Value' or 'Pushing the Pace.' At a bare minimum, a meeting of NIHR senior leaders and colleagues should be convened in the next 12 months to surface the key issues for wider debate.</p>                                                                                                                                                                                                                                                                                                                                                                                                                                 |

## Appendix 3

### Review Panel Membership

Simon Denegri, Chair of Review and NIHR National Director for Patients and the Public / Chair, INVOLVE, NIHR

Tina Coldham, Mental Health User Consultant, Trainer & Researcher / Member of INVOLVE

Dr Stuart Eglin, Regional Director, NHS Research and Development North West, Honorary Visiting Professor, Institute of Psychology, Health and Society, University of Liverpool, Associate Member of INVOLVE

Dr Robert Frost, Policy Director, Medical Advocacy and Policy, GSK

Lynn Kerridge, Chief Executive, NIHR Evaluation, Trials and Studies Coordinating Centre (NETSCC)

Rachel Matthews, Theme Lead for Patient and Public Engagement and Involvement NIHR CLAHRC North West London

Dr Virginia Minogue, Research lead, NHS England

Tara Mistry, NIHR Advisory Board and Member of INVOLVE/NIHR

Dr Sophie Staniszewska, Vice-Chair of the Review, Associate Member of INVOLVE, Senior Research Fellow, Patient and Public Involvement and Patient Experiences, Warwick Medical School, RCN Research Institute, University of Warwick

Dr Claire Stephenson, Research Support Network Manager, Parkinson's UK

Derek C. Stewart, OBE, Associate Director for PPI, NIHR Clinical Research Network,

Philippa Yeeles, Head of Patient and Public Involvement, NIHR Central Commissioning Facility (CCF)

Sarah Buckland, (Observer), Director, INVOLVE Co-ordinating Centre

Kay Pattison, (Observer), Research Programmes and Contracts Senior Manager Research and Development, Department of Health

Kathy Mann (secretariat), NIHR Research Programmes Officer, Research and Development, Department of Health.

# BMJ Open

## Reviewing progress in public involvement in NIHR research: Developing and implementing a new vision for the future

|                                    |                                                                                                                                                                                                                                                                                                                                                                                                                                                                                                                                                                                                                          |
|------------------------------------|--------------------------------------------------------------------------------------------------------------------------------------------------------------------------------------------------------------------------------------------------------------------------------------------------------------------------------------------------------------------------------------------------------------------------------------------------------------------------------------------------------------------------------------------------------------------------------------------------------------------------|
| Journal:                           | <i>BMJ Open</i>                                                                                                                                                                                                                                                                                                                                                                                                                                                                                                                                                                                                          |
| Manuscript ID                      | bmjopen-2017-017124.R1                                                                                                                                                                                                                                                                                                                                                                                                                                                                                                                                                                                                   |
| Article Type:                      | Research                                                                                                                                                                                                                                                                                                                                                                                                                                                                                                                                                                                                                 |
| Date Submitted by the Author:      | 11-Apr-2018                                                                                                                                                                                                                                                                                                                                                                                                                                                                                                                                                                                                              |
| Complete List of Authors:          | Staniszewska, Sophie; University of Warwick, Warwick Medical School<br>Denegri, Simon; NIHR, National Director for Public Participation and<br>Engagement in Research; INVOLVE,<br>Matthews, Rachel; National Institute of Health Research Collaboration for<br>Leadership in Applied Health Research and Care (NIHR CLAHRC) Northwest<br>London, UK/ Imperial College, UK, National Institute of Health Research<br>Collaboration for Leadership in Applied Health Research and Care (NIHR<br>CLAHRC) Northwest London, UK/ Imperial College, UK<br>Minogue, Virginia; NHS England , Commissioning Strategy Directorate |
| <b>Primary Subject<br>Heading</b>: | Health policy                                                                                                                                                                                                                                                                                                                                                                                                                                                                                                                                                                                                            |
| Secondary Subject Heading:         | Patient-centred medicine                                                                                                                                                                                                                                                                                                                                                                                                                                                                                                                                                                                                 |
| Keywords:                          | Patient and public involvement, Public engagement, Health policy <<br>HEALTH SERVICES ADMINISTRATION & MANAGEMENT                                                                                                                                                                                                                                                                                                                                                                                                                                                                                                        |
|                                    |                                                                                                                                                                                                                                                                                                                                                                                                                                                                                                                                                                                                                          |

SCHOLARONE™  
Manuscripts

only

# Reviewing progress in public involvement in NIHR research: Developing and implementing a new vision for the future

Staniszewska S (1), Denegri S, (2) Matthews R, (3) Minogue V (4)

(On behalf of the Breaking Boundaries Review Panel)

Corresponding author: (1) Dr Sophie Staniszewska, RCN Research Institute, Warwick Medical School, Division of Health Sciences, University of Warwick, Coventry CV4 7AL. Tel: 024 7615 0622

[sophie.staniszewska@warwick.ac.uk](mailto:sophie.staniszewska@warwick.ac.uk)

**Funding statement:** This work was supported by National Institute for Health Research. SS is part-funded by CLAHRC WM.

(2) Simon Denegri, NIHR National Director for Patients and the Public in Research and Chair, INVOLVE, hosted by UCL School of Life and Medical Sciences

(3) Rachel Matthews, National Institute for Health Research (NIHR) Collaboration for Leadership and Applied Health Research and Care (CLAHRC) Northwest London

(4) Dr Virginia Minogue, NHS England, Leeds, UK

**Keywords:** Public involvement, engagement, research, policy, barriers, enablers



## Abstract

**Objectives:** To review the progress of public involvement (PPI) in NIHR (National Institute for Health Research) research, identify barriers and enablers, reflect on the influence of PPI on the wider health research system in the UK and internationally, and develop a vision for public involvement in research for 2025. The developing evidence base, growing institutional commitment and public involvement activity highlights its growth as a significant international social movement.

**Design:** The 'Breaking Boundaries Review' was commissioned by the Department of Health. An expert advisory panel was convened. Data sources included; an online survey, international evidence sessions, workshop events, open submission of documents and supporting materials and existing systematic reviews. Thematic analysis identified key themes. NVivo was used for data management. The themes informed the report's vision, mission and recommendations, published as 'Going the Extra Mile – Improving the health and the wealth of the nation through public involvement in research.' The Review is now being implemented across the NIHR.

**Results:** This paper reports the Review findings, the first of its type internationally. A range of barriers and enablers to progress were identified, including attitudes, resources, infrastructure, training and support, and leadership. The importance of evidence to underpin practice and continuous improvement emerged. Co-production was identified as a concept central to strengthening public involvement in the future. The Vision and Mission are supported by four suggested measures of success, reach, refinement, relevance and relationships.

**Conclusions:** The NIHR is the first funder of its size and importance globally to review its approach to public involvement. While significant progress has been made, there is a need to consolidate progress and accelerate the spread of effective practice, drawing on evidence. The outcomes of the Review are being implemented across the NIHR. The findings and recommendations have transferability for other organisations, countries, and individuals.

## Strengths

- The NIHR is the first funder of its size and importance globally to review its approach to public involvement.
- The breadth of the evidence collected including from patients, carers and the public, NIHR facilities and institutions, other funders and research organisations, and international initiatives.
- Evidence-based policy development that is now being implemented.

## Limitations

- Review primarily focused on research activities of the NIHR
- Further exploration required to assess equivalence of themes in international contexts.

**Funding statement:** This work was supported by the National Institute for Health Research (NIHR). SS is part-funded by CLAHRC WM.

Word count: 6698 excluding tables, references and appendices.

## Background

### Introduction

Public involvement is becoming an increasingly important feature of health research, nationally and internationally. Public involvement – as defined by INVOLVE and adopted for the National Institute for Health Research (NIHR) Review in England is undertaken ‘with’ or ‘by’ patients or members of the public, rather than ‘to’, ‘about’ or ‘for’ them.<sup>1</sup> It can mean people becoming members of the research team, or part of reference groups, involved in key discussions and decisions, sharing their unique knowledge, expertise and perspective. For example, they may be involved in identifying key research questions, planning study designs, selecting appropriate outcome measures, collecting data, analysing and interpreting data, disseminating and implementing results.<sup>1</sup> This active involvement is different from people participating as passive subjects in clinical trials with little contribution to identifying its need, designing, conducting or interpreting the trial. It also differs from public engagement which creates a dialogue between researchers and the public to improve public awareness and understanding about research.<sup>2</sup> The intention of public involvement is to prioritise and create research that is relevant, acceptable and appropriate from the patient or public perspective.<sup>3-6</sup> It may be more likely to be implemented, creating greater impact on health and well-being, particularly if patients also have an active role in implementation.<sup>7</sup> It can also help avoid waste in research by ensuring it focuses on issues of importance and benefit for patients<sup>8</sup>, so maximising the potential for democratic accountability to the wider public, who fund a significant proportion of UK research.

Public involvement is growing as a movement in the UK, Canada, Australia, Europe and the US. For instance, in the US, the Patient Centred Outcomes Research Institute (PCORI) encourages patients to submit research questions, provide input on funding applications, participate in events and become an ambassador, reflecting many aspects of NIHR activity.<sup>9</sup> The developing evidence base and growing institutional commitment to public involvement highlights its growth as an international social movement, gathering strength and creating significant changes in research is conducted.<sup>10</sup> Public involvement is focusing on how individuals, communities and patient groups can co-

1  
2  
3 produce with researchers and health professionals, knowledge that will underpin their  
4 care and treatment. The potential benefits of public involvement in research and on  
5 researchers, patients and the wider community have been identified.<sup>4,5,6</sup> The beneficial  
6 impacts of public involvement on research, researchers, patient and communities  
7 include the: identification of patient-relevant topics; grounding of studies in the day-to-  
8 day reality of patient experience, enhancing the relevance and appropriateness of  
9 studies; identification of patient important outcome measures and; solving challenges in  
10 securing informed consent. For patients and the public benefits include: feeling listened  
11 to and empowered; increased confidence and self-worth and, enhanced skills for self-  
12 management.<sup>4,5,6</sup> Patients involved in research can also benefit in a number of ways  
13 which can improve their experience of care.<sup>11,12,13</sup> In summary, public involvement has  
14 been found to have a significant role to play in improving the effectiveness and  
15 efficiency of research<sup>14</sup> and community and patient empowerment are seen as critical  
16 elements in helping the NHS meet future challenges.<sup>15</sup>

17  
18  
19 Nonetheless, in spite of the emerging evidence base for public involvement over the last  
20 twenty years, and a noticeable increase in the number of papers published more  
21 recently, challenges remain. These include the quality and utility of the evidence base  
22 for practice, including poor conceptualisation, varied definitions, limited capture or  
23 measurement of PPI impact and relatively few studies looking at later outcomes of PPI  
24 in research.<sup>4,5,6</sup> A significant difficulty is inconsistent reporting of PPI, with studies often  
25 providing partial reporting of their aims, methods and results of PPI in their studies,  
26 limiting our understanding of them.<sup>16</sup>

27  
28  
29 In addition, the practice of PI is not unproblematic and there is still a significant need to  
30 attend to the cultural barriers that inhibit PPI from being completely embedded in  
31 research. A recently launched International PPI Network is attempting to create  
32 significant culture change in the world of research.<sup>10</sup> In addition, we need to  
33 acknowledge that PPI is not always a positive experience with negative impacts  
34 reported, particularly on the people involved, if carried out poorly<sup>4,17</sup>. In addition, the  
35 tokenism that can exist has been highlighted and the narrowness of current PPI models,  
36 with few organisations mentioning empowerment or addressing equality and diversity in  
37  
38  
39  
40  
41  
42  
43  
44  
45  
46  
47  
48  
49  
50  
51  
52  
53  
54  
55  
56  
57  
58  
59  
60

1  
2  
3 their involvement strategies.<sup>18</sup> The potential for poor practice and negative impact  
4 made it even more important we undertook the Review to find out how far we have  
5 progressed and to understand the current barriers, as well as the enablers.  
6  
7  
8  
9  
10

## 11 **The UK context**

12  
13  
14 In the UK, the NIHR pioneered a strong policy approach to public involvement including  
15 high level support from the Chief Medical Officer.<sup>19</sup> It also established an organisational  
16 infrastructure and system for its advancement, delivery and support and INVOLVE, the  
17 NIHR funded national advisory group for the promotion and advancement of public  
18 involvement. The resulting environment has enabled public involvement to flourish and  
19 become a strategic priority for NIHR. Professor Dame Sally Davies (Chief Medical  
20 Officer) said,  
21  
22  
23  
24  
25

26  
27 *“No matter how complicated the research, or how brilliant the researcher, patients and*  
28 *the public always offer unique, invaluable insights. Their advice when designing,*  
29 *implementing and evaluating research invariably makes studies more effective, more*  
30 *credible and often more cost effective.”<sup>20</sup>*  
31  
32  
33  
34

## 35 **The need for the Review**

36  
37  
38 After 10 years of the NIHR promoting and advancing public involvement across its  
39 growing infrastructure and associated activities, there was a need to review progress  
40 within a UK and international context and to develop a vision for the future and to  
41 identify cultural and organisational development required to fulfil the vision of public  
42 involvement.  
43  
44  
45

46 This was particularly important because the extent to which policy support for PPI in  
47 health research results in any actual influence on health research agendas also remains  
48 unclear.<sup>21</sup> In addition progress has been relatively slow in funders recognising the  
49 importance of funding the substantive development of the PPI evidence base  
50 substantively, as opposed to funding the practice of PPI as a stream of activity within a  
51 study.  
52  
53  
54  
55  
56  
57  
58  
59  
60

1  
2  
3  
4  
5 As a result the 'Breaking Boundaries Review' was announced by the Department of  
6 Health on March 31st 2014 and reported as 'Going the Extra Mile' <sup>2</sup> a year later. It was  
7 the first such Review by the NIHR of its public involvement work and the first of its type  
8 internationally. It was designed as an open and collaborative exercise involving patients,  
9 the public, other funders and partners nationally and internationally. The Review Group  
10 also felt the need for the policy review to be evidence-informed in examining progress  
11 made and in developing a vision for the future.  
12  
13  
14  
15  
16  
17  
18

### 19 **Aims of the Review:**

- 20 1. To review progress made in public involvement in research the UK.
- 21 2. To develop a vision for public involvement in research for 2025 vision and  
22 objectives for the NIHR's leadership in public involvement.
- 23 3. To identify cultural and organisational development required to fulfil the vision of  
24 public involvement as an embedded component of health research in NIHR.  
25  
26  
27  
28  
29

### 30 **Methods**

#### 31 **Review panel**

32  
33  
34  
35 A Review Panel was established to shape the Review. Members' expertise included  
36 research, policy, research management, and patient and public involvement. All  
37 members of the panel, including the service users were involved in the planning of the  
38 Review, design of the survey, analysis and interpretation and in planning the evidence  
39 sessions. Three members were service users. A full list of members is provided in  
40 appendix 1.  
41  
42  
43  
44  
45

#### 46 **Ethical aspects**

47  
48  
49 While formal ethical approval was not sought through an NHS ethics committee for this  
50 policy review, it was conducted according to Health Research Authority (HRA) principles  
51 of good ethical conduct in research which were applied to relevant stages of the  
52 Review. Respondents were invited to read an information sheet about the Review  
53 before participating. All respondents were assured of anonymity and confidentiality,  
54  
55  
56  
57  
58  
59

1  
2  
3 unless they gave explicit permission to be quoted. Any identifying information was  
4 removed from quotes used within the main report and publications. All submissions  
5 were stored on the NIHR CLAHRC Northwest London Imperial College computer  
6 system in password protected files.  
7  
8  
9

### 10 **Collection of evidence, experiences and perspectives**

11  
12 The Panel carefully considered the type of evidence and information required to  
13 address the aims of the Review. The intention of this policy review was not to undertake  
14 a review of literature but to be informed by key studies and systematic reviews. There  
15 were no formal criteria for inclusion. All members of the Review Group were asked to  
16 identify key papers they thought were relevant to the Review. Moreover the expert  
17 Panel also recognised the importance of developing a rigorous process of data  
18 collection and analysis, to contribute to high quality evidence-informed policy  
19 recommendations. However, it was also felt that a wider collection of evidence,  
20 experience and perspectives was necessary, in order to adequately address the Review  
21 questions and to meet the NIHR's public involvement values and principles. Five key  
22 approaches were selected to facilitate the breadth of evidence collection, nationally and  
23 internationally, summarised in table 1.  
24  
25  
26  
27  
28  
29  
30  
31  
32  
33

34 **Table 1. A summary of methods of data collection**

|                                                                                              |
|----------------------------------------------------------------------------------------------|
| 37 1. Online questionnaire                                                                   |
| 38 2. Audio and video evidence                                                               |
| 39 3. Document review                                                                        |
| 40 4. International, third sector and industry<br>41 representatives evidence panel sessions |
| 42 5. Workshops, meetings, social media                                                      |

#### 43 **1. Online questionnaire**

44  
45 A survey monkey online questionnaire was developed in collaboration with the Panel to  
46 minimise respondent burden and maximize response. Five key questions were posed to  
47  
48  
49  
50  
51  
52  
53

1  
2  
3 respondents. These were felt by the Panel to align with the aims of the Review and its  
4 key themes. The survey questions were also made available as a downloadable word  
5 document which could be completed electronically or by hand and posted. A purposive  
6 sampling strategy was used to identify a wide range of potential respondents, including  
7 individuals and organisations, with the intention of maximising variation in response.<sup>19</sup>  
8  
9 Individuals and organisations targeted included patients and members of the public,  
10 researchers, clinicians, researchers, user-groups, patient organisations, charities and  
11 policy makers nationally and internationally. The initial email with the link to the on-line  
12 survey was sent to a range of individuals and organisations, who were asked to  
13 cascade it to others nationally and internationally. It was also available on the NIHR  
14 INVOLVE website. It was not possible to identify a final sample size because the email  
15 was cascaded through the public involvement community and within the NIHR.  
16  
17  
18  
19  
20  
21  
22  
23

## 24 **2. Audio and video evidence**

25  
26  
27 Potential respondents to the call for evidence were offered the opportunity to submit  
28 evidence in other formats including audio and video, although no respondents opted for  
29 this.  
30  
31  
32

## 33 **3. Document review**

34  
35  
36 Key documents including papers from the NIHR INVOLVE bibliography such as key  
37 systematic reviews and grey literature were utilised to underpin the Review. No  
38 systematic review was undertaken due to limited resources. Instead Review Group  
39 members and respondents provided key papers, reviews and reports to provide  
40 appropriate background and ensure the underpinning evidence base was considered.  
41  
42  
43  
44  
45  
46

## 47 **4. International, third sector and industry evidence**

48  
49 In addition to written submissions the Review panel requested input from international  
50 colleagues, the third sector and pharmaceutical industry. In total, three panels  
51 convened, one panel focusing on international perspectives, one focusing on industry  
52 views and one focusing on third sector opinion. Participants were selected based on the  
53  
54  
55  
56  
57  
58  
59  
60



1  
2  
3 knowledge of Review panel members. The role of the panels was to provide  
4 perspectives, insights and any relevant information rather than to have an active  
5 involvement role. A set of questions were developed by the Review Panel to support  
6 discussion with invited experts which focused on the broader impact of NIHR's public  
7 involvement strategy, progress in different sectors, perspectives on how successful the  
8 NIHR had been, gaps in provision and areas where it had been less successful.  
9

### 14 **5.Workshops, meetings, social media**

16 Members of the Review Panel joined four workshops hosted by the research team  
17 undertaking a key NIHR PPI study called RAPPORT<sup>22</sup> in order to gather evidence.  
18 Meetings were held in London, Cambridge, Bristol and Newcastle. Social media was  
19 used to publicise the Review, generate debate and encourage submission. An  
20 additional workshop was conducted with representatives from medical charities hosted  
21 by Parkinson's UK in London. The discussions from workshops, meetings and social  
22 media provided a wider context for the Review and its final recommendations but they  
23 were not included as part of the NVivo analysis.  
24  
25  
26  
27  
28  
29  
30

### 31 **Patient and Public Involvement**

33 Table 2 reports PPI using the BMJ Open criteria and appendix 2 reports PPI using  
34 GRIPP2 Short Form.  
35  
36  
37

#### 38 **Table 2 BMJ Open Patient and Public Involvement Reporting Criteria**

39  
40 -How was the development of the research question and outcome measures informed by  
41 patients' priorities, experience, and preferences?

42 *The question was identified by the Review Panel who included patients. Patients had a key*  
43 *role in shaping the review questions, the methods, the interpretation of the data, and the*  
44 *formation of key recommendations.*

45 -How did you involve patients in the design of this study?

46 *Patients shaped the design of the review, contributing to the design of the methods for data*  
47 *collection. Patients particularly emphasised the importance of qualitative data collection to*  
48 *capture experiences and perspectives.*

49 -Were patients involved in the recruitment to and conduct of the study?

50 *Patients were involved with other panel members to identify and recruit participants. The*  
51 *survey link was cascaded through snowball sampling by patients and PPI leads to key contacts*  
52 *and organisations nationally and internationally.*

53 -How will the results be disseminated to study participants?

54 *The study findings will be disseminated through multiple channels including publication,*  
55  
56  
57  
58  
59  
60

1  
2  
3 *meetings, conferences, social media and through the dissemination plan for NIHR to actively*  
4 *implement the recommendations.*

5 -For randomised controlled trials, was the burden of the intervention assessed by patients  
6 themselves?

7 *Not applicable.*

8 -Patient advisers should also be thanked in the contributor ship statement/acknowledgements.  
9 *Patient contributors are thanked in the acknowledgment statement.*  
10  
11

## 12 13 **Analysis**

14  
15 Data submitted to the Review via the online survey, by email and post was managed  
16 using NVivo software for analysis. Thematic analysis was used to identify key themes  
17 emerging from the data.<sup>23</sup> Information provided through other methods was not included  
18 in this analysis, but rather provided wider context. A particular focus was on identifying  
19 common issues, and whether narrative patterns emerged across themes and whether  
20 any patterns related to the source of the evidence. Once a submission was received, it  
21 was logged and given a unique number and saved to the electronic password protected  
22 folder on the Imperial system. Initial thematic analysis was conducted by RM to identify  
23 recurrent or common themes. This included responses to the Review questions and the  
24 submission of any 'open' evidence. A formative summary was developed by RM of  
25 emerging themes, which included a high level summary in the context of the volume  
26 and sources of evidence. SS, VM and SD checked meaning and interpretation. The  
27 emerging themes were discussed with the Panel to check the interpretation of  
28 categories and themes. In order to further structure the analysis RM, SS and VM  
29 developed the emerging themes into a coding framework. The data was then analysed  
30 according to this framework. Development of themes continued until data saturation, the  
31 point at which no new major themes are evolving.<sup>23</sup> As the key themes were identified,  
32 SD, with RM, SS and VM identified broader conceptual themes which captured core  
33 components of the evidence submitted and provided the conceptual underpinning of the  
34 future vision and mission. Panel members also drew on the wider evidence which was  
35 documented from the discussion with the international, industry and third sector panels,  
36 the regional RAPPORT workshops and workshop with medical charities. Two meetings  
37 were held with the Review Panel to scrutinise all available evidence, review  
38 interpretations of data and prioritise the report themes.  
39  
40  
41  
42  
43  
44  
45  
46  
47  
48  
49  
50  
51  
52  
53  
54  
55  
56  
57  
58  
59  
60

## Results

82 responses were received from an individual, institutional, organizational or collective perspective with some submissions representing the combined views, with table 3 reporting respondent characteristics. These included submissions from different parts of the NIHR, medical research charities, universities, industry and third sector bodies. A total of 538 people responded to the online survey. Oral evidence sessions were held with colleagues from US, Denmark, Germany, Canada and Australia.

**Table 3 – Respondent characteristics**

| Respondent characteristic                                 | Number | %   |
|-----------------------------------------------------------|--------|-----|
| Public (service user/patient/consumer/carer)              | 174    | 40  |
| Researcher/academic                                       | 100    | 23  |
| Other research role (e.g. research manager, commissioner) | 39     | 9   |
| Voluntary sector                                          | 27     | 6   |
| User researcher                                           | 24     | 6   |
| Public involvement lead/specialist                        | 52     | 12  |
| Clinician/practitioner/service provider or manager        | 11     | 3   |
| Other                                                     | 6      | 1   |
| Total                                                     | 433    | 100 |
| Unknown                                                   | 105    | -   |

1  
2  
3 Key aspects of Review results are reported in this paper, focusing on positive impacts of  
4 PPI, barriers to PPI and then explore how PPI can be undertaken differently. Future  
5 delivery is considered and the resulting vision and mission are presented.  
6  
7

### 8 9 **NIHR and INVOLVE as positive influences**

10  
11 The evidence indicated that the NIHR's commitment to include the public in research  
12 activity has strengthened over the last ten years and that the presence and activities of  
13 INVOLVE has been important in achieving this. In addition, patients and carers  
14 reported a range of positive impacts including gaining insight into the research process  
15 and learning more about conditions and treatments. They also reported positive  
16 relationships with researchers and welcomed the opportunity to gain new experiences,  
17 knowledge, skills and contacts. For example:  
18  
19  
20  
21  
22

23  
24 *'It has given me a platform to represent the views of carers and service users in the design and*  
25 *implementation of research. It has given me a role in life as a lifelong carer I have often felt apart from*  
26 *the world of work and have before my PPI work floated without a purpose.'* ID 156 Public  
27  
28

29 Researchers identified a range of positive impacts including changing their research  
30 focus to make it more relevant to patients, altering study designs to take account of  
31 experience and improved recruitment. Researchers reported feeling more purposeful  
32 and connected to the potential beneficiaries of research.  
33  
34  
35

36  
37 *'It has helped to keep my research close to the concerns of service users. Working with*  
38 *service user researchers in designing studies has been important in keeping the research*  
39 *questions and methodology focused on the concerns of those who will ultimately benefit.'* ID  
40 332 Researcher/Academic  
41  
42

### 43 **Relevance and usefulness of research with public involvement**

44  
45 Respondents including those from third sector organizations reported that involvement  
46 could result in researchers being more likely to address issues of relevance to those  
47 with direct experience of a condition, treatment and care. Respondents also described  
48 aspects of personal transformation such as gaining new knowledge, changing attitudes  
49 and adopting different ways of doing things for example,  
50  
51  
52  
53  
54  
55  
56  
57  
58  
59  
60

1  
2  
3 *'It has enabled increased recruitment through access to hard to reach and minority groups. It has ensured that public facing research materials are accessible and understandable for*  
4 *lay people - again, this increases recruitment. It has enabled evaluation of the experience of*  
5 *those participating in health research - and subsequent trial design has improved, again*  
6 *increasing recruitment. It has ensured where possible that research outcomes are*  
7 *disseminated in a timely and accessible way – resulting in a more informed patient*  
8 *population.'* ID 91 Public Involvement Lead/Specialist  
9  
10  
11

## 12 **Barriers to public involvement in research**

13  
14  
15 Respondents identified a range of ongoing barriers to public involvement including  
16 public awareness, attitudes, resources, infrastructure, recognition, reward and payment  
17 and resources and training.  
18  
19

### 20 **Public awareness**

21  
22  
23 Although there was greater awareness of public involvement in research, it was felt that  
24 opportunities were not accessible to the wider population. Evidence submitted by those  
25 working in public health particularly emphasised the risk of reinforcing inequalities and  
26 missing opportunities to improve health in communities with the most to gain.  
27  
28  
29

30  
31  
32 *"I think the whole 'public involvement' side of things is very good at the moment. However,*  
33 *the information (online) about it, such as the opportunities available and how to apply,*  
34 *could be simplified'. ID 32 Public*  
35

36  
37 Many commented on the need for a high profile and well-crafted communication  
38 campaign to raise awareness of health research and demystify the activity in a way that  
39 the general population could engage with;  
40  
41

42  
43 *'People need to know what is out there, how they can get involved and why it's happening.*  
44 *The acronyms, that then need to be spelt out and explained along with the many avenues*  
45 *an opportunity comes from, suddenly gets too difficult to decipher unless you're an*  
46 *academic or a clinician... ID 227 Other*  
47  
48  
49

### 50 **Resources**

51  
52 Variability in the availability and allocation of resources to support involvement was a  
53 common theme. There was frustration that funding to support relationship building and  
54 partnership work ahead of preparing funding applications could be difficult to obtain, but  
55  
56  
57  
58  
59

1  
2  
3 was vital in providing an acceptable standard of good involvement practice in the early  
4 stages of research design.  
5  
6

## 7 **Infrastructure**

8  
9  
10 As public involvement has grown across the NIHR, variation in the infrastructure to  
11 support activity has arisen. This raised questions about how infrastructure decisions are  
12 made, what evidence is available about effective models, and to what extent public  
13 involvement practice across the NIHR and the NHS can be aligned.  
14  
15  
16

17  
18 *'There is far too much duplication, working in silos and re-inventing the wheel. We need to free*  
19 *ourselves up to enable more time and resources for innovation and creativity. This needs to be*  
20 *joined up with academic and NHS public involvement strategies so that patients have one gateway*  
21 *into involvement opportunities and clear signposting from there'. ID 526 Public Involvement*  
22 *Lead/Specialist*  
23  
24  
25

## 26 **Recognition, reward and payment**

27  
28  
29 Another significant barrier was the issue of recognition, reward, reimbursement and  
30 payment. Despite the availability of guidance, local NHS and Higher Education  
31 Institutional policies and administrative practices could be problematical which could  
32 slow down prompt reimbursement and payment. Current austerity policies added to  
33 those challenges. There is a risk that those who get involved are those who can afford  
34 the time and money to do so, compounding issues of exclusion.  
35  
36  
37  
38  
39

40  
41 *'Established groups can provide a wide range of support (research design, pre-funding through to*  
42 *dissemination... However, finance for groups such as these is precarious and without sustained and*  
43 *adequate funding it is difficult for groups to continue to develop and expand their contribution*  
44 *despite the increased requirement for PPI if bids are to be successful. Core funding is needed to fund*  
45 *administrative support of the group as well as advertising, outreach work, mentorship and training of*  
46 *current and new members. ID 29e Researcher/Academic*  
47  
48

## 49 **Training and support**

50  
51 Many respondents commented on the need for training and support for public  
52 involvement. There was broad agreement that a basic level of support should be  
53 available to anybody who becomes involved and a minimum skill level and knowledge  
54  
55  
56  
57  
58  
59  
60

1  
2  
3 about public involvement should be incorporated into researcher training. It was  
4 acknowledged there is still significant development needed to embed PPI into the  
5 research culture in terms of training.  
6  
7

8  
9  
10 *'Currently the training provided is basic, to explain what PPI is and help researchers plan*  
11 *how to proceed (I have taught on such workshops). ID 74 Researcher/Academic*  
12

13  
14 *'Training early career researchers in good involvement practice would help increase*  
15 *confidence and understanding of public involvement and reduce the likelihood of bad*  
16 *involvement experiences.. ID 19e Charity*  
17

### 18 19 **Inconsistency in approach**

20  
21 Some respondents identified difficulties of translating evidence of effective PPI into  
22 practice and noted the evolution of ad hoc practice. Many individuals and teams work  
23 independently of each other even within the same organization, institution or region  
24 although there are areas where a more collaborative approach is emerging. For some  
25 there is a desire to introduce standards whilst for others a systematic but flexible  
26 approach which addresses key elements such as 'why', 'how' and 'who' would be more  
27 helpful.  
28  
29

30  
31  
32  
33  
34  
35 *Making all involvement opportunities task specific, time-limited, with clear expectations and*  
36 *guidance on what people should expect from being involved and how their input will be*  
37 *qualified (e.g. two-feedback/appraisal process on how people are performing). Providing*  
38 *information on outcomes of previous, relevant research and examples of how PPI was*  
39 *crucial to the effectiveness of the research trial. 'ID 91 Public Involvement Lead/Specialist*  
40  
41

42  
43 While frameworks for planning evaluations exist, the approach to evaluating PPI was  
44 varied and inconsistent.  
45

46  
47  
48 *One would be at the start of a study, to plan ahead how to evaluate the impact of PPI on the*  
49 *research, and on the contributors (cf. the PiiAF – Public Involvement Impact Assessment*  
50 *Framework document). The second would be, with other researchers and PPI*  
51 *representatives acting as 'critical friends', to reflect on a study at the end and thus to work*  
52 *out what to do better next time. ID 74 Researcher/Academic*  
53  
54  
55  
56  
57  
58  
59



1  
2  
3 Some respondents highlighted increasing pressure to demonstrate the impact of PPI  
4 and ensure it forms part of a University submission to the Research Excellence  
5 Framework, the Higher Education Funding Council evaluation of research quality in  
6 England and Wales.  
7  
8  
9

## 10 **Leadership**

11  
12  
13 A supportive, competent and influential leadership was perceived as critical to the  
14 successful delivery of involvement. Respondents commented on the value of  
15 experiential knowledge of public involvement in leaders. Conversely, perceived lack of  
16 first-hand experience of PPI and limited or absent empathy with patients were thought  
17  
18  
19  
20  
21 to diminish the status of some research leaders. It was suggested that champions of  
22 involvement are required from outside established involvement teams to promote  
23 changes in organisational and institutional culture.  
24  
25  
26

## 27 **Challenges**

28  
29 A number of respondents reported poor experiences with PPI including a general sense  
30 of frustration from engaging with research, understanding the NIHR and how it links to  
31 services. There was also confusion around how to access information and opportunities  
32 about becoming involved, suggesting a varied picture of personal practice,  
33 organisational commitment and institutional culture.  
34  
35  
36  
37  
38

39  
40 *'I wholeheartedly agree with the intentions and principles of PPI... Unfortunately, I think that*  
41 *lip service is given to PPI by some academics. There is a lack of transparency about how*  
42 *service users who are involved in research studies are selected, approached, recruited and*  
43 *what biases might be operating.'* ID 15 Researcher/Academic  
44

45  
46 *...Some organisations are in a frenzy of PPI because they know they have to do it not*  
47 *because they want to.* ID 260 Public  
48

## 49 **Scepticism, professionalisation and confusion**

50  
51 Respondents reported a range of challenges when they undertook public involvement,  
52 including scepticism about its value, uncertainty about its underpinning theoretical  
53 concepts and unclear practice standards. Challenges also included individuals feeling  
54  
55  
56  
57  
58  
59  
60



1  
2  
3 confusion, apprehension and anxiety about how to conduct involvement in a way that  
4 demonstrated a positive impact. Researchers were sometimes wary of using  
5 experienced advisers because they perceived that the very experience those individuals  
6 started from may evolve and be diluted over time. Others felt the development of such  
7 specialist expertise was important and had a beneficial impact.  
8  
9  
10  
11  
12

13 *'PPI architecture tends to call for a small number of individuals to make a massive*  
14 *commitment. This means it is hard to find people who can do it and those who do come*  
15 *forward are probably not representative of the wider population. We should try to design*  
16 *more distributed systems which are less clunky and more dynamic (more "Web 2.0").*  
17 *Instead of periodic half-day meetings, break things up into smaller modules/components*  
18 *that can be distributed among more people so it is less of a burden for each person. This*  
19 *could allow more people to get involved and it would democratize PPI.'* ID 216 Public  
20 *Involvement Lead/Specialist*  
21  
22  
23

24 While a range of barriers were identified and challenges were identified, respondents  
25 recognised that progress in developing and embedding PPI across the NIHR had been  
26 made. This had raised the profile of public involvement, established aspects of good  
27 practice and made a difference for patients and their families by ensuring research was  
28 more meaningful and focused on improved outcomes.  
29  
30  
31  
32

### 33 **Doing public involvement differently**

34  
35 Respondents identified new ways of approaching involvement, reflecting a broad range  
36 of experience now emerging across the NIHR. A number of key areas for future  
37 development emerged.  
38  
39  
40  
41

#### 42 **Practice standards**

43  
44 There was a perceived need to consolidate and use the available evidence to identify  
45 gaps in knowledge. The use of continuous improvement was suggested as way to  
46 improve practice standards alongside peer review, performance management, self-  
47 regulation and independent regulation. The practice standards are now being developed  
48 by INVOLVE through a consultation process which will provide important guidance and  
49 form the basis for continuous improvement.  
50  
51  
52  
53  
54  
55  
56  
57  
58  
59  
60

## Promotion and outreach

Some respondents expressed a desire to extend and deepen the wider involvement of the general population in health research.

*'The sense that getting involved in medical research is an aspect of being a good citizen. I think we should foster a sense that the public have a right to participate and, at a minimum level, perhaps even a duty...I think we should build a sense of reciprocity. The public help by volunteering for trials so what does the public get back? ...The public pays the going rate for the medicines via the tax system and the NHS. .... So I think the reciprocity should come in the form of a bigger say in the direction and shaping of research. ID 216 Public Involvement Specialist/Lead*

## Diversity and inclusion

Current involvement practice was perceived by some as being exclusive and not always fully meeting the requirements and goals of equality legislation. Respondents suggested a range of improvements:

*'Shorter interactive and more accessible involvement so that everyone can join'. ID 525 Young People Advisory Group Researcher Adviser*

*This is difficult for many organisations. Seeing role models like themselves - old/young, non-white, not wearing grey suits - all these would help. People from unrepresented areas may believe that it's not for the likes of them to get involved so showing people who are like them, getting on and making a difference, is likely to be helpful.' ID 29 Public*

Respondents also commented on the need for involvement to more closely reflect diversity in the population. It was felt that if leaders and role models were promoted and recruited from varied backgrounds, this would encourage more people to become involved.

*'Be more aware of community centres, faith centres as sources of research participants. Acknowledge public health expertise in their local communities; community support officers etc. Get Healthwatch involved. Local radio stations (e.g. we have had health/health research message put over local Punjabi radio) Research in the evenings? Weekends?*

1  
2  
3 *Think differently about when research is done and where it is done. Think who are we going*  
4 *to get participating at that time? The times are usually convenient for the researchers*  
5 *rather than the participants. Make it clear that research studies welcome those with*  
6 *access and mobility difficulties. ID 240 Other*  
7  
8  
9

## 10 **The future design and delivery of public involvement in NIHR**

  
11

### 12 **Coordinate and collaborate**

  
13

14  
15 The NIHR was seen as a complex network of organisations that could benefit from a  
16 shared aim for PPI that underpins and informs the development of national policy  
17 supported by local practice. Some regions in England and Wales are already moving to  
18 a position where individuals from different organisations and programmes are joining to  
19 share knowledge and resources, to enhance their own practice.  
20  
21  
22  
23

24  
25 *'Real progress in PPI will not be achieved without an effective mechanism for coordinating*  
26 *PPI efforts across the now many NIHR bodies that have a role in developing, fostering, or*  
27 *implementing PPI. It is essential there is a central body that will coordinate these efforts and*  
28 *will be responsible for ensuring that gaps do not occur, nor needless duplication. ID 24e*  
29 *Public*  
30  
31  
32

### 33 **Flexible evidence-based methods**

  
34

35  
36 Some respondents suggested that the methods of involvement should be evaluated for  
37 their effectiveness. For example, the common practice of inviting one or two patients to  
38 join committees was perceived by some to be of limited value and likely to become less  
39 attractive as an approach. Many respondents felt that knowledge of the 'ingredients' of  
40 effective involvement needed to be developed.  
41  
42  
43  
44  
45

46  
47 *'Involve in the design and delivery as wide a constituency as possible - those with*  
48 *'knowledge', 'experience' and 'expertise', but also those who may be able to assist by asking*  
49 *questions, because they have different backgrounds.'* ID 23e Researcher/Academic  
50  
51

52  
53 Better identification of the key points where involvement makes an impact was also  
54 regarded as important, particularly in relation to deciding research priorities, funding  
55 decisions, and translating findings into real benefits for patients. The need for greater  
56  
57  
58  
59

1  
2  
3 openness and transparency in facilitating conversations with the public was also  
4 considered important. This would enable patients or members of the public to identify  
5 more collaborative or user-led approaches.  
6  
7

8  
9  
10 *'One of the most widely mentioned 'metrics' of improved Public Involvement (PI) would be a*  
11 *growth in collaborative or user-led research. Suggestions for other specific indicators*  
12 *included: routine PI sections in annual reports and evaluation of PI in NIHR funded research*  
13 *project reports; increased representation of people from minority groups; and better*  
14 *recruitment to trials (the latter two suggestions being offered by public contributors). ID 15e*  
15 *RDS collective*  
16  
17

18  
19 Third sector representatives and community voluntary organisations were identified as  
20 potential partners who could more effectively engage with people locally and nationally;  
21  
22

23  
24 *'The voluntary sector could play a key role in both the design and delivery of NIHR funded*  
25 *research. NIHR could establish much stronger links between research charities (such as the*  
26 *Wellcome Trust, Cancer Research UK, the McPin Foundation) and NIHR funded bodies in*  
27 *order to jointly commission and fund research.'* ID 35e Voluntary Sector.'  
28  
29

### 30 31 32 **Continuous improvement**

33  
34 Respondents felt there was a need to collect data to enable continuous improvement  
35 and not just performance management.  
36  
37

38  
39  
40 *' What is required now is a national framework which sets minimum standards for PPI*  
41 *quality, against which funding and ethical approval decision making can be made. There*  
42 *should also be a move towards making incorporation of quality PPI work into funding*  
43 *application bids standard for all reviewing bodies (as done by NIHR). ID 51e Other*  
44  
45

### 46 47 **Developing a future vision**

48  
49 Many respondents, while recognizing progress made so far, expressed the desire to be  
50 ambitious for the future. For some this meant refining practice. For others it was much  
51 more about reframing the purpose of involvement entirely, working differently, and  
52 recognizing the positive connections between engagement, involvement and  
53 participation.  
54  
55  
56  
57

## Valued practice

Respondents felt that the debates about the need for public involvement should mature into discussions about what forms of involvement work in particular contexts. Individuals wanted to place their focus on improving the quality of their PPI in creating relevant research.

*'PPI should be routine – how things are done, not an optional extra. This should be embedded throughout the NHS so that all users of NHS services can expect that research evidence (is) supported by robust PPI. PPI isn't simply an issue for research but for patient care, too'. ID 15e RDS collective*

*'By ten years, public involvement should have a much greater profile than what it has now. Members of the public and patients should know that we actively do research in an array of disease areas or conditions and that there are many opportunities for them to take part in this.' ID 20e Public Involvement Lead/Specialist*

## Better evaluation and evidence

The importance of evidence was a key theme, particularly in relation to how to best evaluate public involvement and embedding it into research thinking and practice:

*The evidence base would be substantially enhanced so that there was a consensus between NIHR, senior researchers, the public and other stakeholders on the value of public involvement and the key factors necessary to ensure effective involvement. We will have an agreed set of methods and indicators for assessing the impact of public involvement that will have contributed to building a convincing evidence base. Public involvement would be so embedded in the culture of NIHR that new staff or new researchers coming into the field would naturally take on the values and practices of effective public involvement. ID 40e Researcher/Academic*

## Key concepts

Analysis of the themes emerging from the evidence submissions and synthesis of the data and discussion with the Review led to the development of a mission and vision as presented in appendix 3. Three concepts for measuring success were suggested:

- Reach: the extent to which people and communities are engaged, participating and involved in NIHR research including the diversity of this population

- 1
- 2
- 3 • Refinement and improvement: how public involvement is adding value to
- 4 research excellence as funded by the NIHR.
- 5
- 6 • Relevance: the extent to which public priorities for research are reflected in NIHR
- 7 funding and activities
- 8
- 9
- 10 • In addition to these three concepts, as the implementation of the
- 11 recommendations has progressed, a fourth theme has emerged, relationships.
- 12 This has been recognised as a significant determinant of success in
- 13 strengthening public involvement.<sup>22</sup>
- 14
- 15
- 16
- 17
- 18

19 Underpinning these concepts is support for the principles of co-production as the basis  
20 of the NIHR's approach in the future. These draw on the Boyle<sup>24-26</sup> definition which  
21 emphasizes the importance of developing close collaborations based on valuing people  
22 as assets with knowledge; recognizing the expertise and perspective people bring to  
23 involvement; promoting good relationships and networks; a perception that all people  
24 involved can benefit from public involvement; recognizing that involvement often  
25 involves an exchange of some type; the process of involvement is important and  
26 requires facilitation; that there is a need to change some of the professional boundaries  
27 that may inhibit more collaborative forms of work.

### 36 **Implementing the Review**

37 In addition to the vision and mission, the Review led to a range of recommendations  
38 presented in appendix 4, designed to strengthen co-production and collaboration at the  
39 heart of research.

40

41

42

43

44

45 These recommendations are now being actively taken forward across the NIHR. 'Going  
46 the Extra Mile' was signed off by the Chief Medical Officer, Professor Dame Sally  
47 Davies, in September 2015 with an instruction to NIHR leaders, organisations and staff  
48 to support its implementation.<sup>19</sup> This position has been supported with the decision by  
49 the Department of Health to regularly audit the NIHR's progress in public involvement  
50 using the report recommendations as its starting point. Lines of responsibility and  
51 accountability for public involvement have been strengthened accordingly.

52

53

54

55

56

57

58

59

60

1  
2  
3  
4  
5 The INVOLVE Co-ordinating Centre's future work programme reflects the priorities  
6 highlighted in the report and is the NIHR's national lead of diversity and inclusion,  
7 learning and development, and community (incorporating co-production). A national  
8 champion for diversity and inclusion has been appointed. The UK continues to be the  
9 only country where national government funds and supports an organisation focused on  
10 public involvement in research.  
11  
12  
13  
14  
15

16  
17 INVOLVE, in partnership with the NIHR's Research Design Services (RDS)  
18 organisation, is in the process of supporting and developing regional networks to  
19 facilitate collaborative working at local and regional level. These will connect with  
20 existing fora and partnerships and will reach across traditional research, services  
21 boundaries. Work is ongoing to refresh the way in which the NIHR presents its public  
22 involvement work beginning with the new corporate website.  
23  
24  
25  
26  
27  
28

29 Work is now well-advanced on developing self-assessment criteria in public involvement  
30 for NIHR organisations. These will be based on a set of values and principles for public  
31 involvement published by INVOLVE in 2015 and a series of workshops to discuss how  
32 best to evolve standards that organisations can operationalise and against which  
33 progress can be assessed. It is hoped that a number of NIHR organisations will pilot  
34 these standards in the near future. This work will feed into emerging thinking about  
35 current reporting requirements on initiatives and how these can be improved in ways  
36 which will best promote continuous improvement. The Review Panel considered and  
37 rejected the notion of a formal regulatory regime for public involvement in favour of an  
38 approach which supported and encouraged organisations and their staff.  
39  
40  
41  
42  
43  
44  
45  
46  
47

48 The programme of reform that is now underway is on top of ongoing innovation in public  
49 involvement activity generally. The expansion of the Patient Research Ambassadors  
50 Initiative (PRAI) across the NHS, the involvement of young people in research,  
51 promotion of public contribution to research through its 'OK to Ask' campaign, and  
52 growth of the James Lind Alliance Priority Setting Partnerships programme are all  
53  
54  
55  
56  
57  
58  
59  
60



1  
2  
3 flagship initiatives which continue to receive support from the NIHR within the new  
4 strategic framework and approach.  
5  
6  
7

## 8 **Discussion and conclusions**

9

10 Arguably the NIHR is the leading public research funder globally when it comes to the  
11 steps it has taken to make public involvement a core principle for how it funds and  
12 supports research excellence. It is perhaps inevitable that it should therefore be the first  
13 to attempt a review of the size and scale of 'Going the Extra Mile.'  
14  
15  
16

17  
18 While the main focus was England, its messages have potential relevance for other  
19 countries developing their public involvement, reflecting wider societal changes towards  
20 a democratisation of research that enhances the quality of research. Public involvement  
21 in the NIHR has made significant progress in the last decade, enabled by a strong  
22 policy and infrastructure, and implemented by a community of practitioners who  
23 recognise the value of actively involving patients and the public in research. We  
24 acknowledge the Review was limited to some extent by the lack of a formally conducted  
25 review of the literature and would recommend this for future policy reviews.  
26  
27  
28  
29  
30  
31

32  
33 The Review identified a range of barriers including limited awareness of opportunities,  
34 lack of diversity, resistant attitudes to involvement, inconsistent levels of resources,  
35 systems that work in different ways, patchy training and support, and variable  
36 organisational implementation. A key finding from the Review is the need for a step  
37 change, increasing the rate of change and with a greater focus on embedding public  
38 involvement in research culture, so that it becomes 'business as usual'. The NIHR  
39 implementation plan is now starting to address this need but its ambition needs to be  
40 recognised as the rule and norms of research need to change for involvement to  
41 properly flourish. The Review was strengthened by the involvement of the Review  
42 Group, including the service users who ensured there was strong PPI in this example of  
43 evidence-informed policy development.  
44  
45  
46  
47  
48  
49  
50  
51

52 While the focus was national, there are important international implications from the  
53 Review. Co-ordination and collaboration across organisations, funders and systems  
54  
55  
56  
57  
58  
59  
60



1  
2  
3 nationally and internationally to deliver high quality public involvement is vital. Public  
4 involvement needs to be underpinned by a strong evidence base which enables the  
5 development of effective practice that is continuously improved and creates a positive  
6 impact. The promotion of opportunities alongside the creation of greater diversity of  
7 individuals involved will help ensure a wide range of voices are heard.  
8  
9

10  
11  
12 In analysing the evidence gathered for the Review, four new key concepts emerged of  
13 importance to the field of PPI; reach, refinement and improvement, relevance, and  
14 relationships. Relationships was added, in the implementation phase, as an additional  
15 key concept, vital to the delivery of the future vision. Reach refers to the extent of  
16 involvement, engagement and participation, ensuring diversity among members of the  
17 public who become involved. To achieve 'reach' researchers and research may need to  
18 work closely with the public to develop new ways of working to ensure diversity and  
19 inclusion are embedded within involvement. Relevance is focused on the extent to  
20 which public priorities for research are reflected in funding and activities. In an era of  
21 limited public funding, there is an ethical imperative to ensure public monies are spent  
22 on research that patients feel has most relevance to their lives and the beneficial impact  
23 it may create. Relevance also refers to ensuring the research questions in a study are  
24 focused on what is acceptable and appropriate from the patient perspective. Drawing on  
25 evidence to refine practice through continuous improvement underpins attempts to  
26 develop relevance.  
27  
28  
29  
30  
31  
32  
33  
34  
35  
36  
37  
38

39 The thematic analysis underpinned the development of the vision of '*Going the Extra*  
40 *Mile*,' of a population actively involved in research to improve health and wellbeing for  
41 themselves, their family and their communities. The mission of '*Going the Extra Mile*' is  
42 of the public as partners in everything we do to deliver high quality research that  
43 improves the health, wellbeing and wealth of the nation. Underpinning this future  
44 mission is the principles of co-production, which emerged as a new and important way  
45 of understanding the step change required in public involvement.<sup>24-26</sup> At its heart is the  
46 co-production of knowledge and evidence through the creation of ways of working,  
47 cultures and systems that support this. From a research perspective, co-production  
48  
49  
50  
51  
52  
53  
54  
55  
56  
57  
58  
59  
60

1  
2  
3 offers a way of constructing 'complete' knowledge that includes all relevant aspects of a  
4  
5 concept.

6  
7  
8 *"In recent years an approach to research that embeds active participation by those with experience of the focus of*  
9 *that research has been **championed** both from the human rights perspective, that people should not be excluded*  
10 *from research that describes and affects their lives, and from a methodological perspective in terms of rigorous*  
11 *research: "... knowledge constructed without the active participation of practitioners can only be partial*  
12 *knowledge" 27*

13  
14 We emphasize that co-production emerged from the Review and during the process we  
15 were not able to explore the concept fully. This in-depth exploration is now being  
16 conducted by INVOLVE, drawing on a review of literature to inform the development of  
17 guidance on co-production and how it can operationalized in health research.  
18  
19  
20  
21  
22

23 In conclusion, 'Going the Extra Mile' challenges researchers, research and the  
24 organisations and institutions that fund and promote it to go further in working alongside  
25 citizens. The Rome Declaration on Responsible Research and Innovation in Europe in  
26 November 2014 emphasizes the need to evolve a more inclusive approach to research.  
27  
28  
29  
30

31 *"Hence, excellence today is about more than ground-breaking discoveries – it includes openness,*  
32 *responsibility and the co-production of knowledge." p.1*  
33  
34

35 Our vision for the future is ambitious and may take many years to achieve. At its heart  
36 there is a fundamental re-orientation of research, its focus, how it is undertaken and  
37 how knowledge is created. As others have said, "if PPI were a drug, it would be  
38 malpractice not to prescribe it." The benefits of co-production could lead us to a new era  
39 in research, one that is focused on the co-production of knowledge that benefits  
40 humanity in a new and fundamental way. Our ambition is that the 'Going the Extra Mile'  
41 Review escalates such paradigm shift and contributes to changing the nature and role  
42 of research, for the benefit of patients, public and wider society.  
43  
44  
45  
46  
47  
48  
49  
50  
51  
52  
53  
54  
55  
56  
57  
58  
59  
60

### Contribution

SD was chair of the Review Group, led on the development of the strategic vision and mission and recommendations in collaboration with the Review Group. SS was vice-chair and supported SD. RM led on the operational aspects of the Review, including the analysis. VM, SS and SD were involved in analysis. SS led the writing of the analysis paper, drawing on the Going the Extra Mile policy report written by SD and RM in collaboration with the Expert Advisory Group.

### Conflict of interest

SS is Co-Editor in Chief of Research Involvement and Engagement. SS is based at the RCN RI at Warwick Medical School and is part funded by CLAHRC WM. SD is a member of the BMJ Editorial Board. RM and VM declare no conflict of interest. This article presents independent research commissioned by the National Institute for Health Research (NIHR) under the Collaborations for Leadership in Applied Health Research and Care (CLAHRC) programme for North West London. The views expressed in this publication are those of the author(s) and not necessarily those of the NHS, the NIHR or the Department of Health.

**Acknowledgment:** We would like to thank the Going the Extra Mile Review Panel (appendix 1) who worked very hard to shape the Review and participated in all aspects of it. We would like to thank the patients who formed part of the Panel and other patient advisors. Finally we would like to thank everyone who participated in the generation of evidence for the Review and shaping its recommendations and conclusions.

**Copyright:** The lead author grants on behalf of all authors an exclusive licence (or non exclusive for government employees) on a worldwide basis to the BMJ Publishing Group Ltd to permit this article (if accepted) to be published in BMJ editions and any other BMJ PGL products and sublicences such use and exploit all subsidiary rights, as set out in our licence.

1  
2  
3 **Transparency declaration:** The lead author affirms that the manuscript is an honest,  
4 accurate, and transparent account of the study being reported; that no important  
5 aspects of the study have been omitted; and that any discrepancies from the study as  
6 planned (and, if relevant, registered) have been explained.  
7  
8  
9

### 10 11 **Funding**

12 The 'Going the Extra Mile' policy review was funded by the National Institute for Health  
13 Research.  
14  
15

### 16 17 **Data sharing statement**

18 Data sharing: no additional data available.  
19  
20  
21  
22  
23  
24  
25  
26  
27  
28  
29  
30  
31  
32  
33  
34  
35  
36  
37  
38  
39  
40  
41  
42  
43  
44  
45  
46  
47  
48  
49  
50  
51  
52  
53  
54  
55  
56  
57  
58  
59  
60

## References

1. INVOLVE. Briefing notes for researchers: Public involvement in NHS, public health and social care. Eastleigh: INVOLVE, 2012.
2. National Institute for Health Research. Going the Extra Mile: Improving the nation's health and wellbeing through public involvement in research. The final report and recommendations to the Director General Research and Development/Chief Medical Officer Department of Health of the 'Breaking Boundaries' strategic review of public involvement in the National Institute for Health Research, 2015.
3. Oliver S, Rees R, Clarke-Jones L, Milne R, Oakley A, Gabbay J et al. A multidimensional conceptual framework for analysing public involvement in health services research. *Health Expectations*. 2008 Mar; 11(1):72-84. Available from: [10.1111/j.1369-7625.2007.00476.x](https://doi.org/10.1111/j.1369-7625.2007.00476.x)
4. Brett J, Staniszewska S, Mockford C et al. A systematic review of the impact of patient and public involvement on service users, researchers and communities. *The Patient* 2014; DOI 10.1007/s40271-014-0065-0
5. Brett J, Staniszewska S et al. Mapping the impact of patient and public involvement on health and social care research: a systematic review. *Health Expectations* 2012. DOI: 10.1111/j.1369-7625.2012.00795.x
6. Mockford C, Staniszewska S et al (2012). A systematic review of the impact of patient and public involvement on health and social services. *International Journal of Quality in Health Care*. doi: 10.1093/intqhc/mzr066.
7. Staniszewska S, Thomas V, Seers K (2013). Patient and public involvement in the implementation of evidence into practice. *Evidence Based Nursing*, 10.1136/eb-2013-101510.
8. Chalmers I, Glasziou P. Avoidable waste in the production and reporting of research evidence. *Lancet*. 2009 Jul 4; 374(9683):86-9. doi: 10.1016/S0140-6736(09)60329-9. Epub 2009 Jun 12.
9. Patient Centred Outcomes Research Institute (PCORI) Website <http://www.pcori.org/get-involved> Accessed 9 January 2017
10. Tessa Richards: Patient and public involvement in research goes global. <http://blogs.bmj.com/bmj/category/editors-at-large/tessa-richards/>
11. Coulter A, Collins A. Making Shared Decision-Making a reality. No decision about me, without me. The Kings Fund, 2011.

- 1  
2  
3 12. Robert, G. (2013) Participatory action research: using experience-based co-design  
4 to improve the quality of healthcare services. Chapter 14 in *Understanding and Using*  
5 *Health Experiences*. Ziebland, S. Coulter, A. Calabrese, J. Locock, L. (eds) Oxford ,  
6 Oxford University Press.  
7
- 8  
9 13. Foot, C. Gilbert, H. Dunn, P. et al (2014) *People in control of their own health. The*  
10 *state of Involvement*. London, The King's Fund.  
11
- 12 14. Ennis, L. Wykes, T. (2013) Impact of patient involvement in mental health research:  
13 longitudinal study. *The British Journal of Psychiatry* 203: pp 381-6.  
14
- 15  
16 15. NHS England (2014) Five Year Forward View. London: Department of Health.  
17
- 18 16. Staniszewska S, Brett J, Simera I et al. Staniszewska S, Seers K, Altman DG, et al.  
19 GRIPP2 reporting checklists: tools to improve reporting of patient and public  
20 involvement in research. *BMJ* 2017;3:j3453.  
21
- 22  
23 17. Staniszewska S, Mockford C, Gibson A, Herron-Marx S, Putz R (2011). Moving  
24 forward: understanding the negative experiences and impacts of patient and public  
25 involvement in health service planning, development and evaluation. In: Barnes, Marian  
26 and Cotterell, Phil eds. *Critical Perspectives on User Involvement*. Bristol: The Policy  
27 Press, pp. 129–141.  
28
- 29  
30 18. Ocloo, Matthews From tokenism to empowerment: progressing patient and public  
31 involvement in healthcare improvement *BMJ Qual Saf* Published doi: 10.1136/bmjqs-  
32 2015-004839  
33
- 34 19. Chief Medical Officer response to NIHR Going the Extra Mile Policy Review.  
35 [http://www.nihr.ac.uk/newsroom/response-to-going-the-extra-mile-from-professor-dame-](http://www.nihr.ac.uk/newsroom/response-to-going-the-extra-mile-from-professor-dame-sally-c-davies-the-governments-chief-medical-officer/3056?diaryentryid=10192)  
36 [sally-c-davies-the-governments-chief-medical-officer/3056?diaryentryid=10192](http://www.nihr.ac.uk/newsroom/response-to-going-the-extra-mile-from-professor-dame-sally-c-davies-the-governments-chief-medical-officer/3056?diaryentryid=10192)  
37 (Accessed 7 March 2016)  
38
- 39  
40 20. Staley K (2009). Exploring impact: public involvement in NHS, public health and  
41 social care research. Eastleigh: INVOLVE.  
42
- 43 21. Madden, M., and Morley, R. (2016). Exploring the challenge of health research  
44 priority setting in partnership: reflections on the methodology used by the James Lind  
45 Alliance Pressure Ulcer Priority Setting Partnership. *Res. Involvement Engagement* 2,  
46 12. doi:10.1186/s40900-016-0026-y  
47
- 48  
49 22. Wilson P, Mathie E, Keenan J, McNeilly E, Goodman C, Howe A, Poland F,  
50 Staniszewska S, Kendall S, Munday D, Cowe M, Peckham S ReseArch with Patient and  
51 Public invOLvement: a RealisT evaluation - the RAPPORT study. *Journal: Health*  
52 *Services and Delivery Research* Volume: 3 Issue: 38 Publication date: September 2015.  
53 DOI: <http://dx.doi.org/10.3310/hsdr03380>  
54  
55  
56  
57  
58  
59  
60

- 1  
2  
3 23. Creswell, J. *Qualitative Inquiry & Research Design: Choosing Among Five*  
4 *Approaches*. Thousand Oaks. CA: Sage Publications, 2007.  
5  
6  
7 24. Boyle D, Slay J, Stephens L. *Public Services Inside Out. Putting co-production into*  
8 *practice*. London: NESTA, 2010.  
9  
10  
11 25. Boyle, D. Harris, M (2009) *The challenge of co-production. How equal partnerships*  
12 *between professionals and the public are crucial to improving public services*. NESTA,  
13 London  
14  
15  
16 26. Boyle, D. Slay, J. Stephens, L. (2010) *Public Services Inside Out. Putting co-*  
17 *production into practice*. NESTA, London.  
18  
19  
20 27. Somekh, B. (2002). Inhabiting each other's castles: Towards knowledge and mutual  
21 growth through collaboration. In Christopher Day, John Elliott, Bridget Somekh &  
22 Richard Winter (Eds.), *Theory and practice in action research: Some international*  
23 *perspectives* (pp.79-104). Oxford:Symposium Books  
24  
25  
26  
27  
28  
29  
30  
31  
32  
33  
34  
35  
36  
37  
38  
39  
40  
41  
42  
43  
44  
45  
46  
47  
48  
49  
50  
51  
52  
53  
54  
55  
56  
57  
58  
59  
60

## Appendix 1

### Review Panel Membership

Simon Denegri, Chair of Review and NIHR National Director for Patients and the Public / Chair, INVOLVE, NIHR

Tina Coldham, Mental Health User Consultant, Trainer & Researcher / Member of INVOLVE

Dr Stuart Eglin, Regional Director, NHS Research and Development North West, Honorary Visiting Professor, Institute of Psychology, Health and Society, University of Liverpool, Associate Member of INVOLVE

Dr Robert Frost, Policy Director, Medical Advocacy and Policy, GSK

Lynn Kerridge, Chief Executive, NIHR Evaluation, Trials and Studies Coordinating Centre (NETSCC)

Rachel Matthews, Theme Lead for Patient and Public Engagement and Involvement NIHR CLAHRC North West London

Dr Virginia Minogue, Research lead, NHS England

Tara Mistry, NIHR Advisory Board and Member of INVOLVE/NIHR

Prof Sophie Staniszewska, Vice-Chair of the Review, Associate Member of INVOLVE, Senior Research Fellow, Patient and Public Involvement and Patient Experiences, Warwick Medical School, RCN Research Institute, University of Warwick

Dr Claire Stephenson, Research Support Network Manager, Parkinson's UK

Derek C. Stewart, OBE, Associate Director for PPI, NIHR Clinical Research Network,

Philippa Yeeles, Head of Patient and Public Involvement, NIHR Central Commissioning Facility (CCF)

Sarah Buckland, (Observer), Director, INVOLVE Co-ordinating Centre

Kay Pattison, (Observer), Research Programmes and Contracts Senior Manager Research and Development, Department of Health

Kathy Mann (secretariat), NIHR Research Programmes Officer, Research and Development, Department of Health.



## Appendix 2 GRIPP2 Short Form

|                                                                                                                                                                                          |                                                                                                                                                                                                                                                                                                                                                                                                                                                                                                                                                                                                                                                                                       |
|------------------------------------------------------------------------------------------------------------------------------------------------------------------------------------------|---------------------------------------------------------------------------------------------------------------------------------------------------------------------------------------------------------------------------------------------------------------------------------------------------------------------------------------------------------------------------------------------------------------------------------------------------------------------------------------------------------------------------------------------------------------------------------------------------------------------------------------------------------------------------------------|
| <p><b>1: Aim Report the aim of PPI in the study</b></p>                                                                                                                                  | <p>The aim of the PPI in the study was to broaden the perspective of the Review to ensure it reflected the patient and public perspective.</p>                                                                                                                                                                                                                                                                                                                                                                                                                                                                                                                                        |
| <p><b>2: Methods: Provide a clear description of the methods used for PPI in the study</b></p>                                                                                           | <p>Patients on the Review Panel shaped the design of the review, contributing to the design of data collection method. Patients particularly emphasised the importance of qualitative data collection to capture experiences and perspectives. Patients contributed to the discussions that identified the need for more than one mechanism to gather views and opinions about the progress of public involvement across NIHR since 2006. This enabled the provision of online and postal contributions and included the use of meetings to gather views too. Patients contributed to the discussion of the results, their interpretation and the development of recommendations.</p> |
| <p><b>3: Study results—Report the results of PPI in the study, including both positive and negative outcomes</b></p>                                                                     | <p>The PPI contributed to ensuring the transparency of the process as patient panel members agreed on the process and interpretation of the data. The decision to focus on qualitative data collection meant responders were able to provide in depth data that enabled important insights. Patients were involved in the synthesis of data and the identification of key themes and recommendations. Patients were instrumental in championing recommendations to improve diversity and inclusion.</p>                                                                                                                                                                               |
| <p><b>4. Discussion and conclusions—Comment on the extent to which PPI influenced the study overall. Describe positive and negative effects</b></p>                                      | <p>The PPI in the Review was important as it placed patient members at the heart of decision-making at key points in the Review. It influenced all the key decisions undertaken and ensured the Review was co-produced by the entire Review panel. In a future review patient members could have a greater role in the way in which diversity and inclusion shape and are considered within policy reviews.</p>                                                                                                                                                                                                                                                                       |
| <p><b>Reflections/critical perspective Comment critically on the study, reflecting on the things that went well and those that did not, so others can learn from this experience</b></p> | <p>The PPI input was important in shaping the aim, conduct and outcomes of the Review. Of particular importance was the decision to collect the rich qualitative data which revealed important experiential insights that may not have been captured in desktop evidence gathering conducted in isolation. Future policy reviews need to carefully consider the intersection between the PPI in the process of policy review and the underpinning evidence in framing the policy messages.</p>                                                                                                                                                                                        |

### Appendix 3 Vision, mission, strategic goals and principles for 2025

#### Vision

A population actively involved in research to improve health and wellbeing for themselves, their family and their communities.

#### Mission

The public as partners in everything we do to deliver high quality research that improves the health, wellbeing and wealth of the nation.

#### Strategic goals

1. Opportunities to engage and become involved in research are visible and seized by the public.
2. The experience of patients, service users and carers is a fundamental and valued source of knowledge.
3. Public involvement is a required part of high quality research conducted by researchers and their institutions.
4. Public involvement is locally driven and relevant whilst strategically consistent with the NIHR's goals
5. Evidence of what works is accessible so that others can put it into practice
6. The NIHR has maintained its global presence and influence for working in partnership with the public.

#### Principles

1. Building on people's existing capabilities
2. Promoting mutuality and reciprocity
3. Developing peer support networks
4. Breaking down boundaries
5. Facilitating as well as delivering
6. Recognising people and their experiences as assets

Adapted from Boyle, D, Slay , J and Stephens L. (2010) *Public Services Inside Out. Putting Co-production into Practice*. NESTA, London

## Appendix 4 Going the Extra Mile Recommendations

|                                             |                                                                                                                                                                                                                                                                                                                                                                                                                                                                                                                                                                                                                                                                                                                                                                                                                                                                                                                                                                                                                                                                                                                                                                                                                                                                                                                                                                                                                                                                                                |
|---------------------------------------------|------------------------------------------------------------------------------------------------------------------------------------------------------------------------------------------------------------------------------------------------------------------------------------------------------------------------------------------------------------------------------------------------------------------------------------------------------------------------------------------------------------------------------------------------------------------------------------------------------------------------------------------------------------------------------------------------------------------------------------------------------------------------------------------------------------------------------------------------------------------------------------------------------------------------------------------------------------------------------------------------------------------------------------------------------------------------------------------------------------------------------------------------------------------------------------------------------------------------------------------------------------------------------------------------------------------------------------------------------------------------------------------------------------------------------------------------------------------------------------------------|
| <p><b>Communication and Information</b></p> | <ul style="list-style-type: none"> <li>■ A consortium including the NIHR, NHS England, Public Health England and public representation should be established on a time-limited basis to consider the needs of patients and the public for information about research. It should have the ability to develop and test different approaches to providing people with information as part of the care pathway and in different service contexts.</li> <li>■ A single access point or ‘portal’ for enabling patients and the public to access information simply and easily about research how they contribute locally and nationally should be co-produced by the NIHR, NHS England, patients and the public and third sector organisations. NHS badging and placement will be an important to public trust.</li> <li>■ The NIHR should run an annual competition to identify best practice and new ideas in using social media and new technology in public involvement, engagement and participation.</li> </ul>                                                                                                                                                                                                                                                                                                                                                                                                                                                                                |
| <p><b>Culture</b></p>                       | <ul style="list-style-type: none"> <li>■ The NIHR should commission the development of a set of values, principles and standards for public involvement. These must be co-produced with the public and other partners. They should be framed in such a way, and with a clear set of self-assessment criteria, so that organisations across the NIHR see their adoption as integral to their continuous improvement in public involvement. The achievements of the public, staff and researchers in promoting and advancing public involvement should be celebrated and acknowledged by the NIHR.</li> <li>■ The strategic goals identified in this report should be included in the NIHR overall strategic plan – otherwise known as Vision, Strategy, Actions, Measures (VSAM). These should be the objectives against which public involvement, engagement and participation are planned and reported across the NIHR health research system.</li> </ul>                                                                                                                                                                                                                                                                                                                                                                                                                                                                                                                                     |
| <p><b>Continuous improvement</b></p>        | <ul style="list-style-type: none"> <li>■ We recommend that INVOLVE builds on its forthcoming report on organisational approaches to learning and development by providing leadership and co-ordination including working with workforce development initiatives across the NIHR. It is clear from our inquiry that the public and researchers need to be better supported to do public involvement. All NIHR leaders, funded researchers and staff should receive an induction in public involvement as part of the overall change programme set out in this document. Public involvement leads across the NIHR should also have their own leadership and development programme and opportunities to network and share good practice.</li> <li>■ We recommend that the NIHR measures success along three indices for the foreseeable future:             <ul style="list-style-type: none"> <li>• Reach: the extent to which people and communities are engaged, participating and involved in NIHR research including the diversity of this population</li> <li>• Relevance: the extent to which public priorities for research are reflected in NIHR funding and activities</li> <li>• Refinement and improvement: how public involvement is adding value to research excellence as funded by the NIHR.</li> </ul> </li> <li>■ The results of the 2014 Research Excellence Framework (REF) should be analysed by INVOLVE for key learnings and ways to develop this evidence base</li> </ul> |

|                      |                                                                                                                                                                                                                                                                                                                                                                                                                                                                                                                                                                                                                                                                                                                                                                                                                                                                                                                                                                                                                                                                                                                                                                                                                                                                                                                                                                                                                                                                                                                                                                                                                                                                                                                                                                       |
|----------------------|-----------------------------------------------------------------------------------------------------------------------------------------------------------------------------------------------------------------------------------------------------------------------------------------------------------------------------------------------------------------------------------------------------------------------------------------------------------------------------------------------------------------------------------------------------------------------------------------------------------------------------------------------------------------------------------------------------------------------------------------------------------------------------------------------------------------------------------------------------------------------------------------------------------------------------------------------------------------------------------------------------------------------------------------------------------------------------------------------------------------------------------------------------------------------------------------------------------------------------------------------------------------------------------------------------------------------------------------------------------------------------------------------------------------------------------------------------------------------------------------------------------------------------------------------------------------------------------------------------------------------------------------------------------------------------------------------------------------------------------------------------------------------|
|                      | <p>for REF2020. Above all, public involvement, particularly in relation to the gaining of knowledge, should have an equal importance to wider forms of engagement and science communication, within the REF 2020 definition of societal benefit for panels that have a service remit.</p> <ul style="list-style-type: none"> <li>■ An independent review should be commissioned by the NIHR in three years' time to assess the progress made in taking forward the recommendations in this report.</li> </ul>                                                                                                                                                                                                                                                                                                                                                                                                                                                                                                                                                                                                                                                                                                                                                                                                                                                                                                                                                                                                                                                                                                                                                                                                                                                         |
| <b>Co-production</b> | <p>The public, researchers and health professionals should be empowered and supported better to work together in the future. In respect of the co-production principles that we have been minded to embrace we recommend that the NIHR consider establishing a co-production taskforce to examine how these can be applied in practice. The taskforce should have the ability to undertake rapid-testing of these to establish their importance in delivering research excellence.</p>                                                                                                                                                                                                                                                                                                                                                                                                                                                                                                                                                                                                                                                                                                                                                                                                                                                                                                                                                                                                                                                                                                                                                                                                                                                                                |
| <b>Connectivity</b>  | <p>What's happening at grassroots level must continue to be the driving force in public involvement. Here we wish to see further support given to work that is <b><i>locally inspired and driven whilst strategically consistent</i></b> with the NIHR overall goals:</p> <ul style="list-style-type: none"> <li>■ Regional public involvement, engagement and participation 'citizen' forums and strategies should be developed in each of the Academic Health Science Networks (AHSN) geographies. We would expect the NIHR's Collaborations for Leadership in Applied Health Research and Care (CLAHRCs), Research Design Services (RDSs), Local Clinical Research Networks (LCRNs), Biomedical Research Centres and Units (BRC/Us) to play a key leadership role in the development of these.</li> <li>■ Regionally, locally and institutionally, NIHR infrastructure (CLAHRCs, BRU/, BRCs, LCRNs etc.) Directors and Boards should support and encourage public involvement leads to identify cross-cutting activity in public involvement and develop joint plans and stable resourcing where relevant.</li> <li>■ Regional and local partnerships should be identified by the National Director for Patients and the Public in Research to lead on tackling key challenges in the development of public involvement, beginning with diversity and inclusion.</li> <li>■ Building partnerships beyond NIHR boundaries – with servicepartners, third sector and civic organisations - should be seen as a marker of success in this area and measured appropriately.</li> <li>■ Strengthening and improving the support available to researchers locally and regionally through current delivery mechanisms such as the NIHR Research Design Service.</li> </ul> |

|                     | <b>Appendix 2 - continued<br/>Recommendations</b>                                                                                                                                                                                                                                                                                                                                                                                                                                                                                                                                                                                                                                                                                                                                                                                                                                                                                                                                                                                                                                                                                                                                                        |
|---------------------|----------------------------------------------------------------------------------------------------------------------------------------------------------------------------------------------------------------------------------------------------------------------------------------------------------------------------------------------------------------------------------------------------------------------------------------------------------------------------------------------------------------------------------------------------------------------------------------------------------------------------------------------------------------------------------------------------------------------------------------------------------------------------------------------------------------------------------------------------------------------------------------------------------------------------------------------------------------------------------------------------------------------------------------------------------------------------------------------------------------------------------------------------------------------------------------------------------|
| <b>Coordination</b> | <ul style="list-style-type: none"> <li>■ Leadership and appropriate governance structures will be vital to ensuring that the future development of public involvement in the NIHR has a clear sense of direction and is accountable. The NIHR National Director for Patients and the Public in Research should establish a leadership group consisting of public contributors, senior researchers, public involvement and engagement leads, and a supporting NIHR-wide public involvement forum of public involvement and engagement leads, to provide consistent and coordinated strategic leadership for public involvement, engagement and participation activities across NIHR and identify clear priorities for resourcing.</li> <li>■ All NIHR Coordinating Centres and infrastructure organisations should have a strategy, framework or plan that covers the promotion and advancement of public involvement, participation and engagement in research. Leadership, accountability and funding for this agenda within organisations must be clear and transparent. Progress should be reported annually, made publicly available and an overview included in the NIHRs annual report.</li> </ul> |
| <b>Community</b>    | <p>A diverse and inclusive public involvement community is essential if research is relevant to population needs and provides better health outcomes for all. We have been struck by the degree to which researchers and public contributors have encountered barriers when trying to work with different communities and populations. This suggests a system-wide issue that needs considered and careful attention. We would recommend that a specific NIHR workstream be developed in this area in the same way that it has developed other work programmes such as 'Adding Value' or 'Pushing the Pace.' At a bare minimum, a meeting of NIHR senior leaders and colleagues should be convened in the next 12 months to surface the key issues for wider debate.</p>                                                                                                                                                                                                                                                                                                                                                                                                                                 |

1  
2  
3  
4  
5  
6  
7  
8  
9  
10  
11  
12  
13  
14  
15  
16  
17  
18  
19  
20  
21  
22  
23  
24  
25  
26  
27  
28  
29  
30  
31  
32  
33  
34  
35  
36  
37  
38  
39  
40  
41  
42  
43  
44  
45  
46  
47  
48  
49  
50  
51  
52  
53  
54  
55  
56  
57  
58  
59  
60

For peer review only
